# Supplementary material
Source: publisher figshare collection journal article supplement (https://gsajournals.figshare.com/ndownloader/files/28101918)
Supplement: Supplementary file 1 [file 28101918]

## Sheet: lncRNA.list
Gene ID	Nearest_ref_gene	Isoform ID	Nearest_ref_transcript	Type	Length	Lncrna-classification
Gene000010	CIL0001S0040	Isoform000020	CIL0001S0040	new	276	Sense LncRNAs
Gene000018	-	Isoform000037	-	novel	2739	Intergenic LncRNAs
Gene000040	CIL0114S0013	Isoform000083	-	novel	3269	Other
Gene000040	CIL0114S0013	Isoform000087	-	novel	2096	Other
Gene000041	CIL0114S0025	Isoform000089	-	novel	1988	Intergenic LncRNAs
Gene000074	CIL1259S0010	Isoform000152	CIL1259S0010	new	203	Sense LncRNAs
Gene000075	CIL1259S0012,CIL1259S0013	Isoform000157	CIL1259S0012	new	678	Intronic LncRNAs
Gene000082	-	Isoform000185	-	novel	2989	Intergenic LncRNAs
Gene000085	CIL1259S0066	Isoform000190	CIL1259S0066	new	213	Sense LncRNAs
Gene000089	CIL1259S0082	Isoform000202	CIL1259S0082	new	2465	Sense LncRNAs
Gene000092	-	Isoform000212	-	novel	829	Intergenic LncRNAs
Gene000093	CIL1262S0021	Isoform000214	CIL1262S0021	new	3606	Intronic LncRNAs
Gene000104	-	Isoform000231	-	novel	425	Intergenic LncRNAs
Gene000107	-	Isoform000234	-	novel	644	Intergenic LncRNAs
Gene000107	-	Isoform000235	-	novel	540	Intergenic LncRNAs
Gene000111	CIL0013S0015	Isoform000245	CIL0013S0015	new	291	Sense LncRNAs
Gene000135	CIL1263S0094	Isoform000289	-	novel	464	Other
Gene000196	CIL1264S0025	Isoform000409	CIL1264S0025	new	485	Sense LncRNAs
Gene000198	CIL1264S0033	Isoform000413	CIL1264S0033	new	2731	Intronic LncRNAs
Gene000204	CIL1264S0059,CIL1264S0061	Isoform000428	CIL1264S0061	new	225	Sense LncRNAs
Gene000249	CIL1265S0038	Isoform000498	CIL1265S0038	new	275	Sense LncRNAs
Gene000254	CIL1265S0058	Isoform000511	CIL1265S0058	new	634	Sense LncRNAs
Gene000276	CIL1266S0036	Isoform000551	CIL1266S0036	new	288	Sense LncRNAs
Gene000283	CIL1266S0022	Isoform000568	CIL1266S0022	new	286	Sense LncRNAs
Gene000288	-	Isoform000578	-	novel	728	Intergenic LncRNAs
Gene000295	-	Isoform000585	-	novel	843	Intergenic LncRNAs
Gene000299	CIL1267S0028	Isoform000591	CIL1267S0028	new	169	Sense LncRNAs
Gene000301	CIL1268S0013,CIL1268S0014	Isoform000596	-	novel	262	Other
Gene000314	-	Isoform000623	-	novel	694	Intergenic LncRNAs
Gene000315	-	Isoform000624	-	novel	636	Intergenic LncRNAs
Gene000333	-	Isoform000664	-	novel	425	Other
Gene000346	CIL1271S0030	Isoform000686	-	novel	1350	Other
Gene000352	CIL1271S0053,CIL1271S0054	Isoform000701	CIL1271S0054	new	348	Sense LncRNAs
Gene000369	CIL1273S0026,CIL1273S0027,CIL1273S0029,CIL1273S0030,CIL1273S0031	Isoform000733	CIL1273S0031	new	686	Sense LncRNAs
Gene000373	CIL1273S0053	Isoform000744	CIL1273S0053	new	241	Sense LncRNAs
Gene000390	CIL1273S0061	Isoform000778	CIL1273S0061	new	268	Sense LncRNAs
Gene000402	CIL1274S0031	Isoform000796	CIL1274S0031	new	179	Sense LncRNAs
Gene000407	-	Isoform000803	-	novel	439	Intergenic LncRNAs
Gene000413	-	Isoform000811	-	novel	877	Intergenic LncRNAs
Gene000414	-	Isoform000812	-	novel	619	Intergenic LncRNAs
Gene000427	-	Isoform000832	-	novel	367	Antisense LncRNAs
Gene000433	-	Isoform000841	-	novel	347	Intergenic LncRNAs
Gene000434	CIL1276S0032,CIL1276S0033	Isoform000843	CIL1276S0033	new	179	Sense LncRNAs
Gene000454	CIL1277S0071	Isoform000896	-	novel	235	Other
Gene000464	-	Isoform000931	-	novel	2254	Bidirectional LncRNAs
Gene000470	-	Isoform000948	-	novel	236	Intergenic LncRNAs
Gene000476	-	Isoform000960	-	novel	310	Intergenic LncRNAs
Gene000488	CIL1279S0012	Isoform000978	CIL1279S0012	new	1931	Antisense LncRNAs,Sense LncRNAs
Gene000491	CIL1279S0023	Isoform000985	CIL1279S0023	new	1193	Sense LncRNAs
Gene000497	CIL1280S0027	Isoform000997	CIL1280S0027	new	200	Sense LncRNAs
Gene000502	CIL1282S0017	Isoform001009	CIL1282S0017	new	1010	Sense LncRNAs
Gene000510	CIL1282S0051	Isoform001022	CIL1282S0051	new	205	Sense LncRNAs
Gene000515	CIL1282S0024	Isoform001028	CIL1282S0024	new	367	Sense LncRNAs
Gene000522	-	Isoform001037	-	novel	247	Intergenic LncRNAs
Gene000547	-	Isoform001070	-	novel	199	Intergenic LncRNAs
Gene000548	-	Isoform001071	-	novel	315	Other
Gene000552	-	Isoform001075	-	novel	252	Bidirectional LncRNAs
Gene000553	-	Isoform001076	-	novel	405	Other
Gene000556	-	Isoform001081	-	novel	213	Antisense LncRNAs
Gene000559	CIL1286S0023	Isoform001084	CIL1286S0023	new	310	Sense LncRNAs
Gene000564	-	Isoform001089	-	novel	2283	Intergenic LncRNAs
Gene000578	-	Isoform001123	-	novel	2061	Intergenic LncRNAs
Gene000579	-	Isoform001124	-	novel	419	Intergenic LncRNAs
Gene000588	CIL1290S0042	Isoform001138	CIL1290S0042	new	218	Sense LncRNAs
Gene000606	-	Isoform001168	-	novel	232	Intergenic LncRNAs
Gene000608	CIL1293S0023	Isoform001171	CIL1293S0023	new	376	Sense LncRNAs
Gene000608	CIL1293S0023	Isoform001174	CIL1293S0023	new	226	Sense LncRNAs
Gene000638	CIL1293S0061	Isoform001265	CIL1293S0061	new	363	Sense LncRNAs
Gene000645	CIL1293S0083	Isoform001297	-	novel	255	Other
Gene000687	CIL1295S0006	Isoform001414	CIL1295S0006	new	251	Sense LncRNAs
Gene000699	CIL1295S0060	Isoform001437	CIL1295S0060	new	746	Intronic LncRNAs
Gene000712	CIL1295S0033	Isoform001458	CIL1295S0033	new	301	Sense LncRNAs
Gene000723	-	Isoform001484	-	novel	239	Other
Gene000736	-	Isoform001512	-	novel	641	Intergenic LncRNAs
Gene000741	-	Isoform001521	-	novel	547	Intergenic LncRNAs
Gene000758	CIL1298S0054	Isoform001558	CIL1298S0054	new	233	Intronic LncRNAs
Gene000766	CIL1298S0037,CIL1298S0038	Isoform001571	CIL1298S0038	new	257	Sense LncRNAs
Gene000782	-	Isoform001610	-	novel	1372	Intergenic LncRNAs
Gene000782	-	Isoform001611	-	novel	4325	Intergenic LncRNAs
Gene000807	CIL1300S0064	Isoform001656	CIL1300S0064	new	270	Sense LncRNAs
Gene000814	CIL1300S0071	Isoform001669	CIL1300S0071	new	377	Sense LncRNAs
Gene000845	CIL1304S0023	Isoform001742	CIL1304S0023	new	212	Sense LncRNAs
Gene000862	CIL1305S0048	Isoform001772	CIL1305S0048	new	276	Sense LncRNAs
Gene000894	CIL1306S0037,CIL1306S0038	Isoform001855	CIL1306S0037,CIL1306S0038	new	352	Sense LncRNAs
Gene000902	-	Isoform001869	-	novel	488	Bidirectional LncRNAs
Gene000913	CIL1308S0027	Isoform001946	-	novel	322	Other
Gene000919	CIL1308S0009	Isoform001957	CIL1308S0009	new	490	Sense LncRNAs
Gene000974	-	Isoform002074	-	novel	407	Intergenic LncRNAs
Gene000981	CIL0118S0002	Isoform002095	-	novel	173	Other
Gene000989	CIL1313S0016	Isoform002110	-	novel	424	Other
Gene000995	-	Isoform002121	-	novel	316	Bidirectional LncRNAs
Gene000999	-	Isoform002129	-	novel	2726	Bidirectional LncRNAs
Gene001012	CIL1315S0007	Isoform002154	CIL1315S0007	new	341	Sense LncRNAs
Gene001014	CIL1315S0017	Isoform002159	CIL1315S0017	new	295	Sense LncRNAs
Gene001024	CIL1315S0004	Isoform002183	CIL1315S0004	new	5178	Sense LncRNAs
Gene001029	-	Isoform002192	-	novel	1963	Antisense LncRNAs
Gene001101	CIL1318S0014	Isoform002347	CIL1318S0014	new	196	Sense LncRNAs
Gene001116	CIL1319S0021	Isoform002385	CIL1319S0021	new	380	Sense LncRNAs
Gene001122	CIL1320S0013	Isoform002397	CIL1320S0013	new	263	Sense LncRNAs
Gene001133	CIL1320S0017	Isoform002416	-	novel	471	Other
Gene001142	CIL1320S0049|CIL1320S0050	Isoform002433	-	novel	212	Other
Gene001151	-	Isoform002451	-	novel	393	Intergenic LncRNAs
Gene001170	CIL1323S0034	Isoform002499	CIL1323S0034	new	218	Sense LncRNAs
Gene001185	CIL1324S0018	Isoform002522	CIL1324S0018	new	270	Sense LncRNAs
Gene001195	-	Isoform002550	-	novel	476	Intergenic LncRNAs
Gene001199	-	Isoform002560	-	novel	385	Intergenic LncRNAs
Gene001206	-	Isoform002569	-	novel	233	Intergenic LncRNAs
Gene001214	CIL1324S0057	Isoform002581	CIL1324S0057	new	353	Sense LncRNAs
Gene001214	CIL1324S0057	Isoform002582	CIL1324S0057	new	218	Sense LncRNAs
Gene001221	-	Isoform002593	-	novel	665	Antisense LncRNAs
Gene001286	CIL1326S0030	Isoform002744	CIL1326S0030	new	1925	Sense LncRNAs
Gene001298	-	Isoform002765	-	novel	735	Antisense LncRNAs
Gene001317	CIL1328S0003,CIL1328S0004	Isoform002806	CIL1328S0003,CIL1328S0004	new	382	Sense LncRNAs
Gene001318	-	Isoform002807	-	novel	3342	Other
Gene001318	-	Isoform002808	-	novel	2416	Intergenic LncRNAs
Gene001318	-	Isoform002809	-	novel	2631	Intergenic LncRNAs
Gene001319	CIL1328S0005	Isoform002811	CIL1328S0005	new	2364	Sense LncRNAs
Gene001319	CIL1328S0005	Isoform002812	CIL1328S0005	new	665	Sense LncRNAs
Gene001320	-	Isoform002813	-	novel	3184	Intergenic LncRNAs
Gene001320	-	Isoform002814	-	novel	1515	Intergenic LncRNAs
Gene001323	CIL1328S0027,CIL1328S0029	Isoform002828	-	novel	3021	Antisense LncRNAs
Gene001329	CIL1328S0055,CIL1328S0057,CIL1328S0062,CIL1328S0063,CIL1328S0066	Isoform002851	CIL1328S0055	new	225	Sense LncRNAs
Gene001337	CIL1328S0031	Isoform002876	CIL1328S0031	new	277	Intronic LncRNAs
Gene001344	CIL1328S0064	Isoform002892	CIL1328S0064	new	366	Sense LncRNAs
Gene001376	CIL1332S0006	Isoform002965	CIL1332S0006	new	547	Sense LncRNAs
Gene001384	-	Isoform002979	-	novel	249	Bidirectional LncRNAs
Gene001390	CIL1332S0048	Isoform002996	-	novel	463	Other
Gene001391	CIL1332S0049	Isoform003010	CIL1332S0049	new	251	Sense LncRNAs
Gene001396	CIL1332S0062,CIL1332S0063	Isoform003021	CIL1332S0062	new	2280	Intronic LncRNAs
Gene001442	-	Isoform003145	-	novel	438	Intergenic LncRNAs
Gene001453	CIL1335S0040	Isoform003161	CIL1335S0040	new	323	Sense LncRNAs
Gene001455	CIL1335S0009	Isoform003163	CIL1335S0009	new	509	Sense LncRNAs
Gene001461	CIL1335S0038	Isoform003178	CIL1335S0038	new	208	Sense LncRNAs
Gene001468	CIL1336S0037	Isoform003191	CIL1336S0037	new	338	Sense LncRNAs
Gene001476	-	Isoform003211	-	novel	406	Intergenic LncRNAs
Gene001485	CIL1336S0035	Isoform003231	CIL1336S0035	new	226	Sense LncRNAs
Gene001486	CIL1336S0040	Isoform003235	CIL1336S0040	new	365	Sense LncRNAs
Gene001530	CIL0121S0021	Isoform003312	CIL0121S0021	new	354	Sense LncRNAs
Gene001532	CIL1340S0010,CIL1340S0011,CIL1340S0012	Isoform003320	-	novel	742	Bidirectional LncRNAs
Gene001534	-	Isoform003322	-	novel	2147	Intergenic LncRNAs
Gene001586	CIL1343S0044	Isoform003428	CIL1343S0044	new	322	Sense LncRNAs
Gene001587	CIL1343S0049	Isoform003433	CIL1343S0049	new	422	Sense LncRNAs
Gene001591	-	Isoform003452	-	novel	309	Intergenic LncRNAs
Gene001597	CIL1343S0023	Isoform003459	CIL1343S0023	new	185	Sense LncRNAs
Gene001598	CIL1343S0025	Isoform003462	CIL1343S0025	new	349	Sense LncRNAs
Gene001607	CIL1343S0043	Isoform003477	CIL1343S0043	new	266	Sense LncRNAs
Gene001616	-	Isoform003497	-	novel	755	Intergenic LncRNAs
Gene001617	CIL1344S0019	Isoform003503	-	novel	521	Other
Gene001650	-	Isoform003581	-	novel	685	Intergenic LncRNAs
Gene001651	-	Isoform003582	-	novel	413	Intronic LncRNAs
Gene001651	-	Isoform003583	-	novel	1132	Intronic LncRNAs
Gene001651	-	Isoform003584	-	novel	445	Intronic LncRNAs
Gene001672	CIL1348S0004	Isoform003642	CIL1348S0004	new	2284	Intronic LncRNAs
Gene001686	CIL1348S0042	Isoform003678	CIL1348S0042	new	439	Sense LncRNAs
Gene001699	-	Isoform003705	-	novel	806	Intergenic LncRNAs
Gene001710	CIL1353S0029	Isoform003721	CIL1353S0029	new	475	Sense LncRNAs
Gene001719	CIL1354S0007	Isoform003738	CIL1354S0007	new	282	Sense LncRNAs
Gene001724	-	Isoform003747	-	novel	377	Bidirectional LncRNAs
Gene001734	CIL1354S0004	Isoform003774	-	novel	292	Other
Gene001765	CIL1358S0008	Isoform003862	CIL1358S0008	new	390	Sense LncRNAs
Gene001766	CIL1358S0019	Isoform003870	CIL1358S0019	new	419	Intronic LncRNAs
Gene001787	-	Isoform003909	-	novel	1192	Intronic LncRNAs
Gene001808	CIL1361S0051,CIL1361S0053	Isoform003952	CIL1361S0051,CIL1361S0053	new	2563	Antisense LncRNAs,Sense LncRNAs
Gene001809	CIL1361S0056	Isoform003959	CIL1361S0056	new	177	Sense LncRNAs
Gene001811	-	Isoform003961	-	novel	554	Antisense LncRNAs
Gene001832	CIL1361S0057	Isoform004012	CIL1361S0057	new	275	Antisense LncRNAs,Sense LncRNAs
Gene001846	-	Isoform004040	-	novel	418	Intergenic LncRNAs
Gene001860	-	Isoform004082	-	novel	229	Intergenic LncRNAs
Gene001869	-	Isoform004102	-	novel	346	Intronic LncRNAs
Gene001876	CIL1366S0016,CIL1366S0017	Isoform004123	-	novel	293	Other
Gene001879	-	Isoform004135	-	novel	259	Intergenic LncRNAs
Gene001886	-	Isoform004153	-	novel	3381	Antisense LncRNAs
Gene001891	CIL1366S0032	Isoform004162	CIL1366S0032	new	309	Sense LncRNAs
Gene001903	-	Isoform004191	-	novel	313	Bidirectional LncRNAs
Gene001923	-	Isoform004228	-	novel	599	Intergenic LncRNAs
Gene001936	-	Isoform004258	-	novel	199	Intergenic LncRNAs
Gene001937	-	Isoform004259	-	novel	317	Intronic LncRNAs
Gene001971	CIL1371S0014	Isoform004339	CIL1371S0014	new	275	Sense LncRNAs
Gene001975	-	Isoform004343	-	novel	491	Antisense LncRNAs
Gene001986	CIL1371S0060	Isoform004363	CIL1371S0060	new	180	Sense LncRNAs
Gene001994	-	Isoform004376	-	novel	268	Bidirectional LncRNAs
Gene002004	-	Isoform004405	-	novel	672	Bidirectional LncRNAs
Gene002004	-	Isoform004406	-	novel	2135	Intergenic LncRNAs
Gene002008	CIL1372S0037	Isoform004418	CIL1372S0037	new	410	Sense LncRNAs
Gene002013	-	Isoform004427	-	novel	341	Intergenic LncRNAs
Gene002023	CIL1374S0038	Isoform004459	CIL1374S0038	new	340	Sense LncRNAs
Gene002027	-	Isoform004465	-	novel	3605	Bidirectional LncRNAs
Gene002034	CIL1375S0012,CIL1375S0013	Isoform004489	CIL1375S0012	new	2469	Intronic LncRNAs
Gene002036	-	Isoform004491	-	novel	771	Intronic LncRNAs
Gene002037	-	Isoform004492	-	novel	403	Intergenic LncRNAs
Gene002050	CIL1375S0024	Isoform004521	CIL1375S0024	new	322	Sense LncRNAs
Gene002080	CIL1378S0012	Isoform004579	CIL1378S0012	new	269	Sense LncRNAs
Gene002086	CIL1380S0026	Isoform004600	-	novel	279	Other
Gene002090	-	Isoform004606	-	novel	590	Intergenic LncRNAs
Gene002098	-	Isoform004626	-	novel	314	Intergenic LncRNAs
Gene002100	CIL1381S0008	Isoform004629	CIL1381S0008	new	291	Sense LncRNAs
Gene002101	CIL1381S0008	Isoform004630	CIL1381S0008	new	3215	Sense LncRNAs
Gene002103	CIL1381S0011	Isoform004633	CIL1381S0011	new	203	Sense LncRNAs
Gene002119	CIL1383S0006	Isoform004666	CIL1383S0006	new	171	Sense LncRNAs
Gene002128	-	Isoform004687	-	novel	510	Intergenic LncRNAs
Gene002151	CIL1384S0005,CIL1384S0018,CIL1384S0020,CIL1384S0026,CIL1384S0029,CIL1384S0032,CIL1384S0036,CIL1384S0038,CIL1384S0040,CIL1384S0041,CIL1384S0048,CIL1384S0051	Isoform004738	CIL1384S0036	new	591	Sense LncRNAs
Gene002151	CIL1384S0005,CIL1384S0018,CIL1384S0020,CIL1384S0026,CIL1384S0029,CIL1384S0032,CIL1384S0036,CIL1384S0038,CIL1384S0040,CIL1384S0041,CIL1384S0048,CIL1384S0051	Isoform004739	CIL1384S0036	new	464	Intronic LncRNAs
Gene002152	CIL1384S0059	Isoform004760	CIL1384S0059	new	3347	Intronic LncRNAs
Gene002163	-	Isoform004784	-	novel	466	Bidirectional LncRNAs
Gene002164	CIL1385S0026	Isoform004786	-	novel	3071	Other
Gene002173	CIL1386S0032	Isoform004806	-	novel	170	Other
Gene002174	CIL1386S0034,CIL1386S0035,CIL1386S0036	Isoform004810	CIL1386S0036	new	225	Sense LncRNAs
Gene002209	CIL1387S0021	Isoform004905	-	novel	340	Other
Gene002219	CIL1390S0009	Isoform004919	CIL1390S0009	new	1274	Sense LncRNAs
Gene002227	CIL1390S0011	Isoform004947	CIL1390S0011	new	266	Sense LncRNAs
Gene002247	CIL1393S0028	Isoform004985	CIL1393S0028	new	270	Sense LncRNAs
Gene002297	-	Isoform005076	-	novel	1851	Intronic LncRNAs
Gene002303	-	Isoform005086	-	novel	342	Intergenic LncRNAs
Gene002306	CIL1396S0021	Isoform005090	CIL1396S0021	new	3152	Intronic LncRNAs
Gene002314	-	Isoform005100	-	novel	254	Intergenic LncRNAs
Gene002315	-	Isoform005101	-	novel	1286	Other
Gene002317	-	Isoform005103	-	novel	473	Antisense LncRNAs
Gene002325	-	Isoform005119	-	novel	3071	Intronic LncRNAs
Gene002328	-	Isoform005124	-	novel	253	Antisense LncRNAs
Gene002342	CIL1400S0006	Isoform005148	CIL1400S0006	new	198	Sense LncRNAs
Gene002349	-	Isoform005156	-	novel	307	Intergenic LncRNAs
Gene002354	-	Isoform005168	-	novel	598	Intergenic LncRNAs
Gene002354	-	Isoform005169	-	novel	3729	Intergenic LncRNAs
Gene002358	CIL1401S0015	Isoform005177	CIL1401S0015	new	291	Sense LncRNAs
Gene002363	CIL1402S0004	Isoform005185	CIL1402S0004	new	553	Sense LncRNAs
Gene002363	CIL1402S0004	Isoform005188	CIL1402S0004	new	284	Sense LncRNAs
Gene002387	-	Isoform005242	-	novel	517	Intergenic LncRNAs
Gene002425	-	Isoform005326	-	novel	2049	Intergenic LncRNAs
Gene002429	CIL1405S0047,CIL1405S0049,CIL1405S0053	Isoform005333	CIL1405S0047,CIL1405S0049,CIL1405S0053	new	282	Antisense LncRNAs,Sense LncRNAs
Gene002463	CIL1406S0010	Isoform005405	-	novel	676	Other
Gene002467	-	Isoform005419	-	novel	259	Bidirectional LncRNAs
Gene002471	-	Isoform005424	-	novel	203	Bidirectional LncRNAs
Gene002472	CIL1406S0004	Isoform005426	CIL1406S0004	new	257	Sense LncRNAs
Gene002477	CIL1407S0009	Isoform005434	CIL1407S0009	new	224	Sense LncRNAs
Gene002486	-	Isoform005450	-	novel	534	Intergenic LncRNAs
Gene002490	-	Isoform005456	-	novel	405	Bidirectional LncRNAs
Gene002499	-	Isoform005484	-	novel	244	Intergenic LncRNAs
Gene002517	CIL1413S0025	Isoform005532	CIL1413S0025	new	208	Intronic LncRNAs
Gene002547	CIL1416S0018	Isoform005588	CIL1416S0018	new	519	Sense LncRNAs
Gene002560	-	Isoform005618	-	novel	428	Intronic LncRNAs
Gene002593	-	Isoform005698	-	novel	295	Intergenic LncRNAs
Gene002594	-	Isoform005700	-	novel	216	Intergenic LncRNAs
Gene002596	CIL1417S0015	Isoform005702	-	novel	478	Other
Gene002631	-	Isoform005768	-	novel	1881	Intergenic LncRNAs
Gene002634	-	Isoform005773	-	novel	333	Intergenic LncRNAs
Gene002657	-	Isoform005822	-	novel	815	Intergenic LncRNAs
Gene002662	-	Isoform005827	-	novel	591	Intergenic LncRNAs
Gene002663	CIL1422S0020	Isoform005831	CIL1422S0020	new	219	Sense LncRNAs
Gene002668	-	Isoform005841	-	novel	180	Intergenic LncRNAs
Gene002672	CIL1424S0005	Isoform005855	CIL1424S0005	new	182	Sense LncRNAs
Gene002674	CIL1424S0007	Isoform005863	CIL1424S0007	new	262	Sense LncRNAs
Gene002688	CIL1424S0028	Isoform005898	CIL1424S0028	new	2016	Intronic LncRNAs
Gene002691	-	Isoform005904	-	novel	3335	Antisense LncRNAs
Gene002694	CIL1424S0041	Isoform005911	CIL1424S0041	new	311	Sense LncRNAs
Gene002711	CIL1425S0044	Isoform005943	CIL1425S0044	new	187	Sense LncRNAs
Gene002718	-	Isoform005961	-	novel	211	Antisense LncRNAs
Gene002719	-	Isoform005962	-	novel	2015	Antisense LncRNAs
Gene002719	-	Isoform005963	-	novel	2105	Antisense LncRNAs
Gene002719	-	Isoform005964	-	novel	2689	Antisense LncRNAs
Gene002720	CIL1427S0019	Isoform005967	-	novel	280	Other
Gene002749	CIL1429S0045	Isoform006025	CIL1429S0045	new	478	Sense LncRNAs
Gene002767	-	Isoform006060	-	novel	4427	Antisense LncRNAs
Gene002772	CIL0128S0010	Isoform006071	CIL0128S0010	new	2731	Antisense LncRNAs,Sense LncRNAs
Gene002775	CIL0128S0033	Isoform006081	CIL0128S0033	new	711	Sense LncRNAs
Gene002807	-	Isoform006149	-	novel	4331	Antisense LncRNAs
Gene002821	-	Isoform006172	-	novel	2960	Intergenic LncRNAs
Gene002833	CIL1436S0011	Isoform006191	CIL1436S0011	new	155	Sense LncRNAs
Gene002834	CIL1436S0012	Isoform006193	CIL1436S0012	new	253	Sense LncRNAs
Gene002880	CIL1439S0007	Isoform006308	CIL1439S0007	new	439	Intronic LncRNAs
Gene002891	-	Isoform006326	-	novel	2918	Antisense LncRNAs
Gene002892	-	Isoform006327	-	novel	742	Bidirectional LncRNAs
Gene002894	-	Isoform006329	-	novel	4766	Intergenic LncRNAs
Gene002897	-	Isoform006337	-	novel	460	Intergenic LncRNAs
Gene002934	CIL1444S0031	Isoform006409	CIL1444S0031	new	211	Sense LncRNAs
Gene002939	-	Isoform006416	-	novel	421	Intergenic LncRNAs
Gene002946	-	Isoform006432	-	novel	821	Intergenic LncRNAs
Gene002964	-	Isoform006497	-	novel	2263	Other
Gene002968	CIL1446S0055	Isoform006510	CIL1446S0055	new	299	Sense LncRNAs
Gene003017	-	Isoform006599	-	novel	478	Intergenic LncRNAs
Gene003023	-	Isoform006609	-	novel	523	Intergenic LncRNAs
Gene003047	CIL1452S0020	Isoform006656	CIL1452S0020	new	737	Sense LncRNAs
Gene003051	CIL1452S0019	Isoform006661	CIL1452S0019	new	621	Sense LncRNAs
Gene003055	-	Isoform006675	-	novel	325	Intergenic LncRNAs
Gene003069	-	Isoform006707	-	novel	2777	Antisense LncRNAs
Gene003071	-	Isoform006709	-	novel	845	Intergenic LncRNAs
Gene003076	-	Isoform006725	-	novel	2543	Intergenic LncRNAs
Gene003077	CIL1454S0014	Isoform006729	CIL1454S0014	new	2775	Intronic LncRNAs
Gene003081	CIL1454S0028,CIL1454S0029	Isoform006744	-	novel	197	Other
Gene003100	CIL1456S0016	Isoform006786	CIL1456S0016	new	540	Sense LncRNAs
Gene003120	CIL1456S0076	Isoform006836	CIL1456S0076	new	215	Sense LncRNAs
Gene003133	CIL1456S0048	Isoform006855	CIL1456S0048	new	338	Sense LncRNAs
Gene003136	CIL1456S0062	Isoform006863	CIL1456S0062	new	1098	Sense LncRNAs
Gene003150	CIL1458S0015	Isoform006880	CIL1458S0015	new	336	Sense LncRNAs
Gene003154	CIL1458S0005	Isoform006885	CIL1458S0005	new	1324	Sense LncRNAs
Gene003169	CIL1459S0035,CIL1459S0036	Isoform006920	-	novel	190	Other
Gene003170	CIL1459S0007	Isoform006924	-	novel	3191	Antisense LncRNAs
Gene003179	-	Isoform006942	-	novel	326	Intergenic LncRNAs
Gene003191	-	Isoform006963	-	novel	452	Intergenic LncRNAs
Gene003197	-	Isoform006974	-	novel	4148	Bidirectional LncRNAs
Gene003198	CIL1461S0010	Isoform006976	-	novel	281	Intergenic LncRNAs
Gene003199	CIL1461S0011	Isoform006979	CIL1461S0011	new	241	Sense LncRNAs
Gene003213	-	Isoform007002	-	novel	1096	Intergenic LncRNAs
Gene003219	-	Isoform007011	-	novel	555	Intergenic LncRNAs
Gene003232	CIL1463S0025	Isoform007028	CIL1463S0025	new	255	Sense LncRNAs
Gene003236	-	Isoform007039	-	novel	548	Intergenic LncRNAs
Gene003262	CIL0131S0008	Isoform007096	CIL0131S0008	new	203	Sense LncRNAs
Gene003275	-	Isoform007114	-	novel	262	Other
Gene003283	-	Isoform007126	-	novel	2075	Intergenic LncRNAs
Gene003299	CIL1467S0027	Isoform007156	CIL1467S0027	new	182	Sense LncRNAs
Gene003314	CIL1468S0020,CIL1468S0021,CIL1468S0022,CIL1468S0023,CIL1468S0027	Isoform007187	-	novel	7641	Antisense LncRNAs
Gene003325	CIL1469S0023,CIL1469S0024,CIL1469S0026,CIL1469S0027	Isoform007225	-	novel	310	Other
Gene003353	-	Isoform007277	-	novel	1165	Antisense LncRNAs
Gene003368	-	Isoform007314	-	novel	2472	Antisense LncRNAs
Gene003371	CIL1471S0014	Isoform007320	CIL1471S0014	new	2833	Sense LncRNAs
Gene003384	-	Isoform007345	-	novel	428	Intergenic LncRNAs
Gene003393	CIL1476S0024	Isoform007365	CIL1476S0024	new	248	Sense LncRNAs
Gene003398	-	Isoform007372	-	novel	1185	Intergenic LncRNAs
Gene003410	CIL1477S0003	Isoform007394	CIL1477S0003	new	2850	Intronic LncRNAs
Gene003414	CIL1477S0015	Isoform007401	CIL1477S0015	new	1902	Intronic LncRNAs
Gene003419	-	Isoform007410	-	novel	274	Other
Gene003445	-	Isoform007467	-	novel	2837	Intergenic LncRNAs
Gene003445	-	Isoform007469	-	novel	1670	Intergenic LncRNAs
Gene003463	-	Isoform007516	-	novel	2751	Antisense LncRNAs
Gene003470	-	Isoform007543	-	novel	777	Intergenic LncRNAs
Gene003470	-	Isoform007544	-	novel	408	Intergenic LncRNAs
Gene003472	CIL1482S0042	Isoform007550	CIL1482S0042	new	304	Sense LncRNAs
Gene003501	-	Isoform007625	-	novel	2497	Antisense LncRNAs
Gene003517	CIL1486S0008,CIL1486S0009,CIL1486S0010,CIL1486S0011	Isoform007657	CIL1486S0008,CIL1486S0009,CIL1486S0010,CIL1486S0011	new	715	Antisense LncRNAs,Sense LncRNAs
Gene003529	-	Isoform007677	-	novel	826	Intronic LncRNAs
Gene003533	-	Isoform007682	-	novel	570	Intergenic LncRNAs
Gene003536	CIL1488S0019	Isoform007699	CIL1488S0019	new	199	Sense LncRNAs
Gene003537	-	Isoform007700	-	novel	529	Intergenic LncRNAs
Gene003550	-	Isoform007728	-	novel	2379	Intergenic LncRNAs
Gene003552	CIL0133S0011	Isoform007735	CIL0133S0011	new	2942	Intronic LncRNAs
Gene003553	CIL0133S0013	Isoform007739	-	novel	489	Intergenic LncRNAs
Gene003601	CIL1494S0045	Isoform007848	CIL1494S0045	new	490	Sense LncRNAs
Gene003631	-	Isoform007916	-	novel	453	Antisense LncRNAs
Gene003662	CIL1497S0008,CIL1497S0010,CIL1497S0012,CIL1497S0013,CIL1497S0015,CIL1497S0016,CIL1497S0030,CIL1497S0031	Isoform007992	-	novel	874	Antisense LncRNAs
Gene003689	-	Isoform008054	-	novel	1039	Antisense LncRNAs
Gene003718	-	Isoform008129	-	novel	1711	Antisense LncRNAs
Gene003737	CIL1501S0028	Isoform008178	-	novel	373	Other
Gene003764	-	Isoform008234	-	novel	826	Antisense LncRNAs
Gene003773	CIL1502S0038	Isoform008264	CIL1502S0038	new	168	Sense LncRNAs
Gene003803	-	Isoform008338	-	novel	347	Antisense LncRNAs
Gene003804	CIL1503S0024	Isoform008340	-	novel	188	Other
Gene003823	-	Isoform008366	-	novel	308	Bidirectional LncRNAs
Gene003834	CIL1505S0033	Isoform008387	CIL1505S0033	new	2578	Sense LncRNAs
Gene003845	CIL1506S0002,CIL1506S0004,CIL1506S0008	Isoform008415	CIL1506S0002	new	648	Sense LncRNAs
Gene003845	CIL1506S0002,CIL1506S0004,CIL1506S0008	Isoform008417	CIL1506S0004	new	378	Sense LncRNAs
Gene003851	CIL1506S0032	Isoform008429	CIL1506S0032	new	190	Sense LncRNAs
Gene003881	CIL1508S0034	Isoform008494	CIL1508S0034	new	385	Intronic LncRNAs
Gene003896	-	Isoform008524	-	novel	3947	Antisense LncRNAs
Gene003908	-	Isoform008544	-	novel	227	Intergenic LncRNAs
Gene003917	-	Isoform008554	-	novel	465	Intergenic LncRNAs
Gene003921	CIL0135S0004	Isoform008563	CIL0135S0004	new	229	Sense LncRNAs
Gene003922	CIL0135S0019	Isoform008564	CIL0135S0019	new	801	Sense LncRNAs
Gene003922	CIL0135S0019	Isoform008565	-	novel	205	Bidirectional LncRNAs
Gene003926	CIL1515S0036	Isoform008574	-	novel	337	Other
Gene003928	CIL1515S0040	Isoform008579	CIL1515S0040	new	342	Sense LncRNAs
Gene003947	CIL1516S0008	Isoform008612	CIL1516S0008	new	3859	Intronic LncRNAs
Gene003954	CIL1517S0003	Isoform008625	CIL1517S0003	new	2498	Sense LncRNAs
Gene003955	-	Isoform008626	-	novel	1069	Bidirectional LncRNAs
Gene003967	-	Isoform008642	-	novel	1925	Intergenic LncRNAs
Gene003971	CIL1518S0022	Isoform008670	CIL1518S0022	new	267	Sense LncRNAs
Gene003972	-	Isoform008671	-	novel	4234	Antisense LncRNAs
Gene003980	-	Isoform008683	-	novel	3379	Antisense LncRNAs
Gene004011	CIL1520S0017,CIL1520S0018	Isoform008747	CIL1520S0017	new	2458	Intronic LncRNAs
Gene004021	CIL1520S0043	Isoform008769	-	novel	187	Other
Gene004022	CIL1520S0048	Isoform008771	CIL1520S0048	new	381	Sense LncRNAs
Gene004025	CIL1521S0001	Isoform008778	CIL1521S0001	new	209	Sense LncRNAs
Gene004048	CIL1525S0021	Isoform008819	CIL1525S0021	new	335	Sense LncRNAs
Gene004061	CIL1526S0019	Isoform008858	-	novel	201	Bidirectional LncRNAs
Gene004076	CIL1528S0007	Isoform008892	-	novel	238	Other
Gene004097	CIL1529S0010	Isoform008933	CIL1529S0010	new	968	Intronic LncRNAs
Gene004109	-	Isoform008960	-	novel	3062	Intergenic LncRNAs
Gene004121	-	Isoform008989	-	novel	3070	Bidirectional LncRNAs
Gene004124	CIL1531S0045	Isoform009002	CIL1531S0045	new	244	Sense LncRNAs
Gene004132	-	Isoform009022	-	novel	229	Intergenic LncRNAs
Gene004166	-	Isoform009076	-	novel	199	Bidirectional LncRNAs
Gene004175	-	Isoform009098	-	novel	534	Intergenic LncRNAs
Gene004193	-	Isoform009126	-	novel	329	Intergenic LncRNAs
Gene004198	-	Isoform009133	-	novel	351	Antisense LncRNAs
Gene004250	CIL1546S0016	Isoform009254	CIL1546S0016	new	221	Sense LncRNAs
Gene004252	-	Isoform009256	-	novel	533	Bidirectional LncRNAs
Gene004252	-	Isoform009257	-	novel	545	Intergenic LncRNAs
Gene004258	CIL1546S0048	Isoform009269	CIL1546S0048	new	398	Intronic LncRNAs
Gene004269	CIL1547S0014	Isoform009302	CIL1547S0014	new	517	Sense LncRNAs
Gene004308	-	Isoform009403	-	novel	164	Intergenic LncRNAs
Gene004317	CIL1553S0006	Isoform009429	CIL1553S0006	new	3338	Sense LncRNAs
Gene004322	-	Isoform009436	-	novel	406	Intergenic LncRNAs
Gene004337	CIL1554S0018	Isoform009465	CIL1554S0018	new	245	Sense LncRNAs
Gene004347	CIL1555S0022,CIL1555S0023	Isoform009481	CIL1555S0023	new	1546	Sense LncRNAs
Gene004362	CIL1555S0020	Isoform009501	CIL1555S0020	new	215	Sense LncRNAs
Gene004375	CIL1557S0018	Isoform009533	CIL1557S0018	new	190	Sense LncRNAs
Gene004379	-	Isoform009538	-	novel	1184	Intergenic LncRNAs
Gene004394	-	Isoform009561	-	novel	363	Intergenic LncRNAs
Gene004426	CIL1564S0018,CIL1564S0019	Isoform009632	CIL1564S0018	new	276	Sense LncRNAs
Gene004427	-	Isoform009637	-	novel	289	Other
Gene004442	-	Isoform009700	-	novel	235	Intergenic LncRNAs
Gene004452	CIL1567S0011	Isoform009723	-	novel	282	Other
Gene004474	CIL1568S0034	Isoform009782	-	novel	339	Antisense LncRNAs
Gene004482	CIL1568S0033	Isoform009801	CIL1568S0033	new	244	Sense LncRNAs
Gene004484	-	Isoform009803	-	novel	466	Bidirectional LncRNAs
Gene004486	CIL1569S0019	Isoform009810	CIL1569S0019	new	549	Sense LncRNAs
Gene004487	-	Isoform009815	-	novel	805	Bidirectional LncRNAs
Gene004488	-	Isoform009816	-	novel	252	Intergenic LncRNAs
Gene004503	CIL0140S0008,CIL0140S0009,CIL0140S0011,CIL0140S0013,CIL0140S0014	Isoform009851	-	novel	854	Other
Gene004505	CIL1572S0006,CIL1572S0007	Isoform009861	CIL1572S0006,CIL1572S0007	new	3213	Sense LncRNAs
Gene004510	CIL1572S0015	Isoform009879	CIL1572S0015	new	393	Sense LncRNAs
Gene004521	-	Isoform009906	-	novel	178	Other
Gene004522	-	Isoform009907	-	novel	420	Bidirectional LncRNAs
Gene004526	CIL1575S0008	Isoform009929	CIL1575S0008	new	242	Intronic LncRNAs
Gene004536	CIL1577S0027	Isoform009951	-	novel	187	Bidirectional LncRNAs
Gene004539	CIL1577S0041	Isoform009960	CIL1577S0041	new	241	Sense LncRNAs
Gene004548	CIL1577S0033	Isoform009982	CIL1577S0033	new	210	Sense LncRNAs
Gene004556	-	Isoform009995	-	novel	2594	Intergenic LncRNAs
Gene004562	CIL1578S0027	Isoform010010	CIL1578S0027	new	405	Sense LncRNAs
Gene004583	CIL1579S0034	Isoform010054	CIL1579S0034	new	2672	Intronic LncRNAs
Gene004584	CIL1579S0004,CIL1579S0005,CIL1579S0006,CIL1579S0007,CIL1579S0010,CIL1579S0013,CIL1579S0015,CIL1579S0017	Isoform010072	CIL1579S0007	new	281	Sense LncRNAs
Gene004586	CIL1582S0012	Isoform010142	CIL1582S0012	new	2927	Sense LncRNAs
Gene004594	-	Isoform010155	-	novel	525	Bidirectional LncRNAs
Gene004594	-	Isoform010156	-	novel	211	Intergenic LncRNAs
Gene004601	-	Isoform010167	-	novel	266	Other
Gene004619	CIL1586S0015	Isoform010213	CIL1586S0015	new	416	Sense LncRNAs
Gene004623	-	Isoform010218	-	novel	1007	Intergenic LncRNAs
Gene004658	CIL1588S0011	Isoform010288	CIL1588S0011	new	408	Sense LncRNAs
Gene004670	-	Isoform010312	-	novel	2360	Intergenic LncRNAs
Gene004698	-	Isoform010374	-	novel	2390	Intergenic LncRNAs
Gene004703	-	Isoform010387	-	novel	275	Bidirectional LncRNAs
Gene004707	-	Isoform010391	-	novel	1753	Intergenic LncRNAs
Gene004734	-	Isoform010432	-	novel	568	Intergenic LncRNAs
Gene004742	CIL1596S0027	Isoform010451	CIL1596S0027	new	1723	Sense LncRNAs
Gene004743	-	Isoform010452	-	novel	538	Intergenic LncRNAs
Gene004749	-	Isoform010460	-	novel	997	Bidirectional LncRNAs
Gene004766	CIL1599S0009	Isoform010496	CIL1599S0009	new	819	Sense LncRNAs
Gene004775	-	Isoform010509	-	novel	472	Intergenic LncRNAs
Gene004782	-	Isoform010524	-	novel	445	Intergenic LncRNAs
Gene004788	-	Isoform010545	-	novel	639	Intergenic LncRNAs
Gene004790	-	Isoform010549	-	novel	214	Intergenic LncRNAs
Gene004794	CIL1602S0004	Isoform010557	CIL1602S0004	new	214	Sense LncRNAs
Gene004826	-	Isoform010639	-	novel	603	Antisense LncRNAs
Gene004836	-	Isoform010657	-	novel	777	Intergenic LncRNAs
Gene004837	-	Isoform010658	-	novel	200	Bidirectional LncRNAs
Gene004866	CIL1607S0033	Isoform010711	CIL1607S0033	new	293	Sense LncRNAs
Gene004877	CIL1609S0016	Isoform010745	CIL1609S0016	new	343	Intronic LncRNAs
Gene004879	CIL1610S0003	Isoform010751	CIL1610S0003	new	202	Sense LncRNAs
Gene004882	CIL1611S0007	Isoform010758	-	novel	430	Other
Gene004885	CIL1611S0019	Isoform010762	CIL1611S0019	new	212	Sense LncRNAs
Gene004890	-	Isoform010774	-	novel	4343	Intergenic LncRNAs
Gene004917	CIL1615S0020	Isoform010820	-	novel	249	Other
Gene004923	CIL0146S0013	Isoform010837	CIL0146S0013	new	253	Intronic LncRNAs
Gene004938	-	Isoform010855	-	novel	1355	Antisense LncRNAs
Gene004941	CIL1619S0010	Isoform010862	CIL1619S0010	new	720	Intronic LncRNAs
Gene004960	-	Isoform010894	-	novel	422	Intronic LncRNAs
Gene004980	CIL0155S0006,CIL0155S0008,CIL0155S0009	Isoform010926	CIL0155S0006	new	663	Sense LncRNAs
Gene004980	CIL0155S0006,CIL0155S0008,CIL0155S0009	Isoform010928	CIL0155S0006	new	965	Sense LncRNAs
Gene004981	CIL0155S0004	Isoform010933	CIL0155S0004	new	212	Sense LncRNAs
Gene004983	-	Isoform010937	-	novel	208	Intergenic LncRNAs
Gene004989	CIL0156S0010	Isoform010949	CIL0156S0010	new	284	Sense LncRNAs
Gene005000	CIL0156S0030	Isoform010983	CIL0156S0030	new	443	Sense LncRNAs
Gene005001	CIL0156S0032	Isoform010988	-	novel	275	Intergenic LncRNAs
Gene005011	-	Isoform011001	-	novel	2571	Intergenic LncRNAs
Gene005017	-	Isoform011019	-	novel	943	Antisense LncRNAs
Gene005019	CIL0160S0014	Isoform011022	CIL0160S0014	new	161	Sense LncRNAs
Gene005027	CIL0163S0015	Isoform011044	CIL0163S0015	new	243	Sense LncRNAs
Gene005032	-	Isoform011056	-	novel	859	Other
Gene005033	CIL0166S0001	Isoform011058	CIL0166S0001	new	5800	Sense LncRNAs
Gene005039	-	Isoform011066	-	novel	1359	Intergenic LncRNAs
Gene005054	-	Isoform011097	-	novel	562	Antisense LncRNAs
Gene005063	CIL0173S0004	Isoform011120	CIL0173S0004	new	262	Intronic LncRNAs
Gene005065	CIL0176S0001	Isoform011123	CIL0176S0001	new	228	Sense LncRNAs
Gene005072	CIL0176S0022	Isoform011133	-	novel	192	Other
Gene005097	CIL0176S0044,CIL0176S0045	Isoform011179	-	novel	318	Other
Gene005105	CIL0177S0020	Isoform011192	CIL0177S0020	new	1560	Antisense LncRNAs,Sense LncRNAs
Gene005112	CIL0178S0001	Isoform011210	-	novel	771	Intergenic LncRNAs
Gene005118	CIL0182S0002	Isoform011222	CIL0182S0002	new	177	Sense LncRNAs
Gene005142	CIL0187S0005	Isoform011280	CIL0187S0005	new	2931	Intronic LncRNAs
Gene005155	-	Isoform011320	-	novel	315	Intronic LncRNAs
Gene005157	CIL0189S0006	Isoform011331	CIL0189S0006	new	280	Sense LncRNAs
Gene005160	CIL0191S0010	Isoform011339	-	novel	489	Other
Gene005166	-	Isoform011350	-	novel	485	Intergenic LncRNAs
Gene005196	CIL0203S0012	Isoform011410	CIL0203S0012	new	528	Sense LncRNAs
Gene005196	CIL0203S0012	Isoform011415	CIL0203S0012	new	160	Sense LncRNAs
Gene005201	CIL0203S0017	Isoform011429	CIL0203S0017	new	222	Sense LncRNAs
Gene005225	-	Isoform011471	-	novel	238	Intergenic LncRNAs
Gene005231	-	Isoform011487	-	novel	3553	Intergenic LncRNAs
Gene005234	CIL0021S0007	Isoform011492	CIL0021S0007	new	1681	Sense LncRNAs
Gene005234	CIL0021S0007	Isoform011493	CIL0021S0007	new	218	Sense LncRNAs
Gene005236	CIL0021S0018	Isoform011501	CIL0021S0018	new	1630	Sense LncRNAs
Gene005267	-	Isoform011585	-	novel	2525	Intergenic LncRNAs
Gene005267	-	Isoform011586	-	novel	2521	Other
Gene005268	-	Isoform011587	-	novel	708	Bidirectional LncRNAs
Gene005287	-	Isoform011626	-	novel	640	Intergenic LncRNAs
Gene005310	-	Isoform011725	-	novel	2381	Antisense LncRNAs
Gene005315	-	Isoform011736	-	novel	538	Intergenic LncRNAs
Gene005318	-	Isoform011743	-	novel	387	Intergenic LncRNAs
Gene005320	-	Isoform011747	-	novel	429	Intergenic LncRNAs
Gene005356	CIL0235S0007	Isoform011817	CIL0235S0007	new	195	Sense LncRNAs
Gene005361	-	Isoform011831	-	novel	353	Intergenic LncRNAs
Gene005377	-	Isoform011878	-	novel	255	Intergenic LncRNAs
Gene005384	-	Isoform011888	-	novel	858	Intergenic LncRNAs
Gene005400	CIL0024S0005	Isoform011913	CIL0024S0005	new	260	Sense LncRNAs
Gene005402	-	Isoform011917	-	novel	257	Antisense LncRNAs
Gene005430	-	Isoform011979	-	novel	3054	Intronic LncRNAs
Gene005436	-	Isoform011989	-	novel	578	Intergenic LncRNAs
Gene005452	-	Isoform012019	-	novel	2312	Intergenic LncRNAs
Gene005457	-	Isoform012025	-	novel	263	Intronic LncRNAs
Gene005459	CIL0259S0012	Isoform012035	CIL0259S0012	new	443	Sense LncRNAs
Gene005462	CIL0259S0016	Isoform012043	CIL0259S0016	new	220	Sense LncRNAs
Gene005479	-	Isoform012080	-	novel	2431	Bidirectional LncRNAs
Gene005486	-	Isoform012104	-	novel	219	Intergenic LncRNAs
Gene005490	-	Isoform012108	-	novel	344	Intergenic LncRNAs
Gene005502	CIL0267S0020	Isoform012133	-	novel	656	Intergenic LncRNAs
Gene005505	CIL0267S0015	Isoform012136	CIL0267S0015	new	233	Sense LncRNAs
Gene005513	-	Isoform012162	-	novel	325	Intergenic LncRNAs
Gene005520	CIL0272S0002	Isoform012170	CIL0272S0002	new	499	Sense LncRNAs
Gene005529	-	Isoform012188	-	novel	691	Bidirectional LncRNAs
Gene005530	CIL0275S0001	Isoform012189	CIL0275S0001	new	280	Sense LncRNAs
Gene005534	-	Isoform012209	-	novel	1245	Intergenic LncRNAs
Gene005537	CIL0277S0001	Isoform012225	CIL0277S0001	new	623	Sense LncRNAs
Gene005546	CIL0027S0005	Isoform012244	CIL0027S0005	new	296	Sense LncRNAs
Gene005548	-	Isoform012255	-	novel	398	Other
Gene005549	CIL0279S0004	Isoform012256	-	novel	424	Bidirectional LncRNAs
Gene005551	-	Isoform012264	-	novel	820	Intergenic LncRNAs
Gene005559	-	Isoform012282	-	novel	442	Bidirectional LncRNAs
Gene005560	-	Isoform012283	-	novel	734	Intergenic LncRNAs
Gene005574	-	Isoform012308	-	novel	300	Intergenic LncRNAs
Gene005580	CIL0286S0017	Isoform012317	-	novel	460	Other
Gene005611	CIL0301S0004	Isoform012385	CIL0301S0004	new	308	Sense LncRNAs
Gene005634	CIL0031S0017	Isoform012436	CIL0031S0017	new	411	Sense LncRNAs
Gene005663	CIL0310S0011	Isoform012495	CIL0310S0011	new	312	Sense LncRNAs
Gene005669	CIL0311S0013	Isoform012510	CIL0311S0013	new	277	Sense LncRNAs
Gene005687	-	Isoform012544	-	novel	1043	Intergenic LncRNAs
Gene005697	CIL0320S0012	Isoform012564	CIL0320S0012	new	245	Intronic LncRNAs
Gene005724	-	Isoform012618	-	novel	3643	Antisense LncRNAs
Gene005740	CIL0326S0007	Isoform012647	CIL0326S0007	new	230	Sense LncRNAs
Gene005747	-	Isoform012660	-	novel	215	Antisense LncRNAs
Gene005757	-	Isoform012682	-	novel	2398	Antisense LncRNAs
Gene005758	-	Isoform012683	-	novel	1413	Intergenic LncRNAs
Gene005760	-	Isoform012691	-	novel	263	Intergenic LncRNAs
Gene005761	-	Isoform012692	-	novel	2666	Intergenic LncRNAs
Gene005767	CIL0338S0014,CIL0338S0015	Isoform012704	CIL0338S0014	new	326	Intronic LncRNAs
Gene005771	-	Isoform012710	-	novel	670	Intergenic LncRNAs
Gene005774	-	Isoform012715	-	novel	3577	Intergenic LncRNAs
Gene005787	CIL0006S0005	Isoform012743	CIL0006S0005	new	310	Intronic LncRNAs
Gene005789	-	Isoform012745	-	novel	179	Intergenic LncRNAs
Gene005796	CIL0344S0010,CIL0344S0011	Isoform012762	-	novel	203	Other
Gene005800	-	Isoform012766	-	novel	418	Antisense LncRNAs
Gene005821	CIL0349S0009	Isoform012806	CIL0349S0009	new	186	Sense LncRNAs
Gene005822	CIL0349S0010	Isoform012808	CIL0349S0010	new	259	Sense LncRNAs
Gene005827	-	Isoform012814	-	novel	813	Intergenic LncRNAs
Gene005831	-	Isoform012827	-	novel	695	Intergenic LncRNAs
Gene005847	CIL0359S0024	Isoform012885	CIL0359S0024	new	3223	Sense LncRNAs
Gene005851	-	Isoform012891	-	novel	1275	Antisense LncRNAs
Gene005852	CIL0359S0021	Isoform012895	CIL0359S0021	new	502	Sense LncRNAs
Gene005864	CIL0040S0013,CIL0040S0014	Isoform012928	CIL0040S0014	new	265	Sense LncRNAs
Gene005866	-	Isoform012940	-	novel	379	Bidirectional LncRNAs
Gene005868	CIL0364S0012	Isoform012944	CIL0364S0012	new	281	Sense LncRNAs
Gene005876	-	Isoform012954	-	novel	261	Intergenic LncRNAs
Gene005880	-	Isoform012959	-	novel	288	Intronic LncRNAs
Gene005888	-	Isoform012969	-	novel	200	Intergenic LncRNAs
Gene005896	-	Isoform012979	-	novel	2436	Bidirectional LncRNAs
Gene005900	-	Isoform013017	-	novel	1604	Antisense LncRNAs
Gene005920	CIL0383S0004	Isoform013047	-	novel	165	Antisense LncRNAs,Sense LncRNAs
Gene005934	CIL0385S0021,CIL0385S0023,CIL0385S0024,CIL0385S0027,CIL0385S0030,CIL0385S0031	Isoform013091	-	novel	612	Bidirectional LncRNAs
Gene005951	CIL0391S0003	Isoform013138	CIL0391S0003	new	256	Sense LncRNAs
Gene005951	CIL0391S0003	Isoform013139	CIL0391S0003	new	3070	Sense LncRNAs
Gene005956	CIL0391S0005	Isoform013146	CIL0391S0005	new	443	Intronic LncRNAs
Gene005960	-	Isoform013154	-	novel	803	Intergenic LncRNAs
Gene005975	CIL0045S0015	Isoform013186	CIL0045S0015	new	479	Sense LncRNAs
Gene005978	CIL0045S0033	Isoform013191	CIL0045S0033	new	1933	Sense LncRNAs
Gene005978	CIL0045S0033	Isoform013192	CIL0045S0033	new	2107	Sense LncRNAs
Gene006001	-	Isoform013249	-	novel	514	Intronic LncRNAs
Gene006014	-	Isoform013272	-	novel	1392	Antisense LncRNAs
Gene006015	-	Isoform013273	-	novel	1668	Intergenic LncRNAs
Gene006016	CIL0409S0003	Isoform013278	CIL0409S0003	new	396	Sense LncRNAs
Gene006031	CIL0413S0003	Isoform013309	CIL0413S0003	new	372	Sense LncRNAs
Gene006036	CIL0046S0018	Isoform013318	CIL0046S0018	new	214	Sense LncRNAs
Gene006043	-	Isoform013332	-	novel	1435	Intergenic LncRNAs
Gene006062	-	Isoform013377	-	novel	2474	Intergenic LncRNAs
Gene006062	-	Isoform013378	-	novel	784	Intergenic LncRNAs
Gene006071	CIL0424S0005	Isoform013393	CIL0424S0005	new	259	Sense LncRNAs
Gene006078	CIL0426S0003	Isoform013402	CIL0426S0003	new	1439	Sense LncRNAs
Gene006078	CIL0426S0003	Isoform013403	-	novel	868	Intergenic LncRNAs
Gene006079	CIL0427S0001	Isoform013406	-	novel	202	Other
Gene006098	-	Isoform013440	-	novel	392	Intergenic LncRNAs
Gene006110	CIL0436S0016	Isoform013459	CIL0436S0016	new	371	Sense LncRNAs
Gene006115	-	Isoform013467	-	novel	720	Antisense LncRNAs
Gene006124	-	Isoform013477	-	novel	246	Intergenic LncRNAs
Gene006140	-	Isoform013505	-	novel	270	Antisense LncRNAs
Gene006186	CIL0478S0001	Isoform013600	CIL0478S0001	new	878	Sense LncRNAs
Gene006209	CIL0481S0004	Isoform013643	CIL0481S0004	new	3209	Intronic LncRNAs
Gene006212	-	Isoform013646	-	novel	2561	Intergenic LncRNAs
Gene006218	-	Isoform013655	-	novel	245	Bidirectional LncRNAs
Gene006223	-	Isoform013664	-	novel	183	Antisense LncRNAs
Gene006252	CIL0516S0007	Isoform013728	CIL0516S0007	new	4052	Intronic LncRNAs
Gene006252	CIL0516S0007	Isoform013729	CIL0516S0007	new	295	Sense LncRNAs
Gene006253	-	Isoform013730	-	novel	1168	Intergenic LncRNAs
Gene006259	-	Isoform013739	-	novel	408	Intergenic LncRNAs
Gene006286	-	Isoform013791	-	novel	2303	Bidirectional LncRNAs
Gene006293	CIL0568S0002	Isoform013805	CIL0568S0002	new	190	Sense LncRNAs
Gene006295	CIL0572S0001,CIL0572S0003	Isoform013807	-	novel	215	Other
Gene006300	CIL0585S0001	Isoform013814	CIL0585S0001	new	160	Sense LncRNAs
Gene006305	-	Isoform013820	-	novel	266	Intergenic LncRNAs
Gene006314	CIL0008S0021	Isoform013838	CIL0008S0021	new	368	Sense LncRNAs
Gene006326	-	Isoform013851	-	novel	2371	Antisense LncRNAs
Gene006352	-	Isoform013907	-	novel	228	Intergenic LncRNAs
Gene006364	CIL0644S0002	Isoform013930	-	novel	320	Other
Gene006369	CIL0644S0023	Isoform013940	CIL0644S0023	new	342	Sense LncRNAs
Gene006379	-	Isoform013956	-	novel	1070	Antisense LncRNAs
Gene006382	-	Isoform013959	-	novel	3011	Intergenic LncRNAs
Gene006388	-	Isoform013971	-	novel	3500	Intergenic LncRNAs
Gene006391	-	Isoform013974	-	novel	586	Other
Gene006404	-	Isoform013998	-	novel	2927	Intergenic LncRNAs
Gene006423	CIL0059S0012	Isoform014039	CIL0059S0012	new	363	Intronic LncRNAs
Gene006430	-	Isoform014052	-	novel	780	Intergenic LncRNAs
Gene006430	-	Isoform014053	-	novel	1463	Intergenic LncRNAs
Gene006431	CIL0059S0014	Isoform014054	CIL0059S0014	new	550	Antisense LncRNAs,Intronic LncRNAs
Gene006436	-	Isoform014061	-	novel	402	Bidirectional LncRNAs
Gene006442	-	Isoform014074	-	novel	741	Intergenic LncRNAs
Gene006455	-	Isoform014095	-	novel	2598	Antisense LncRNAs
Gene006473	-	Isoform014143	-	novel	1383	Intergenic LncRNAs
Gene006492	CIL0782S0002	Isoform014189	CIL0782S0002	new	483	Sense LncRNAs
Gene006501	CIL0782S0007	Isoform014205	CIL0782S0007	new	1137	Sense LncRNAs
Gene006510	-	Isoform014230	-	novel	3092	Antisense LncRNAs
Gene006510	-	Isoform014231	-	novel	376	Intergenic LncRNAs
Gene006511	-	Isoform014233	-	novel	393	Intergenic LncRNAs
Gene006512	-	Isoform014234	-	novel	177	Intergenic LncRNAs
Gene006527	-	Isoform014255	-	novel	1967	Intergenic LncRNAs
Gene006538	-	Isoform014284	-	novel	678	Intergenic LncRNAs
Gene006540	CIL0073S0010	Isoform014287	CIL0073S0010	new	627	Sense LncRNAs
Gene006549	CIL0073S0007	Isoform014302	CIL0073S0007	new	434	Sense LncRNAs
Gene006555	-	Isoform014312	-	novel	3927	Intergenic LncRNAs
Gene006559	CIL0074S0011	Isoform014316	CIL0074S0011	new	785	Sense LncRNAs
Gene006564	CIL0860S0001	Isoform014327	CIL0860S0001	new	280	Sense LncRNAs
Gene006565	CIL0860S0002	Isoform014329	CIL0860S0002	new	368	Sense LncRNAs
Gene006568	CIL0876S0004	Isoform014335	CIL0876S0004	new	239	Sense LncRNAs
Gene006576	-	Isoform014361	-	novel	251	Intergenic LncRNAs
Gene006581	CIL0010S0004	Isoform014373	CIL0010S0004	new	690	Sense LncRNAs
Gene006594	CIL0010S0037	Isoform014397	CIL0010S0037	new	1975	Sense LncRNAs
Gene006623	CIL0893S0107	Isoform014475	CIL0893S0107	new	275	Sense LncRNAs
Gene006624	CIL0893S0117,CIL0893S0118	Isoform014481	CIL0893S0118	new	293	Sense LncRNAs
Gene006632	CIL0893S0147	Isoform014500	CIL0893S0147	new	196	Sense LncRNAs
Gene006655	-	Isoform014547	-	novel	661	Other
Gene006657	CIL0893S0261	Isoform014551	CIL0893S0261	new	350	Sense LncRNAs
Gene006674	CIL0893S0362	Isoform014583	CIL0893S0362	new	313	Sense LncRNAs
Gene006682	-	Isoform014603	-	novel	706	Intergenic LncRNAs
Gene006697	CIL0893S0428	Isoform014640	CIL0893S0428	new	330	Sense LncRNAs
Gene006706	CIL0893S0020	Isoform014655	CIL0893S0020	new	566	Sense LncRNAs
Gene006709	CIL0893S0034	Isoform014659	CIL0893S0034	new	259	Sense LncRNAs
Gene006719	-	Isoform014682	-	novel	2485	Intergenic LncRNAs
Gene006740	CIL0893S0164	Isoform014720	CIL0893S0164	new	808	Antisense LncRNAs,Sense LncRNAs
Gene006749	-	Isoform014736	-	novel	3711	Intergenic LncRNAs
Gene006762	CIL0893S0228	Isoform014765	CIL0893S0228	new	870	Antisense LncRNAs,Sense LncRNAs
Gene006769	CIL0893S0249,CIL0893S0250	Isoform014789	CIL0893S0250	new	815	Sense LncRNAs
Gene006773	CIL0893S0282	Isoform014797	CIL0893S0282	new	331	Sense LncRNAs
Gene006774	CIL0893S0285	Isoform014799	CIL0893S0285	new	431	Sense LncRNAs
Gene006783	-	Isoform014828	-	novel	3580	Antisense LncRNAs
Gene006784	CIL0893S0313	Isoform014830	CIL0893S0313	new	236	Sense LncRNAs
Gene006789	CIL0893S0338,CIL0893S0339	Isoform014840	CIL0893S0338	new	539	Sense LncRNAs
Gene006801	CIL0893S0393	Isoform014873	CIL0893S0393	new	819	Sense LncRNAs
Gene006813	CIL0893S0421,CIL0893S0422	Isoform014897	CIL0893S0421	new	307	Sense LncRNAs
Gene006821	-	Isoform014920	-	novel	212	Intergenic LncRNAs
Gene006824	CIL0895S0033	Isoform014924	CIL0895S0033	new	1843	Sense LncRNAs
Gene006824	CIL0895S0033	Isoform014925	CIL0895S0033	new	2962	Sense LncRNAs
Gene006828	CIL0895S0049	Isoform014946	CIL0895S0049	new	3237	Sense LncRNAs
Gene006839	-	Isoform014961	-	novel	274	Intergenic LncRNAs
Gene006841	CIL0895S0110	Isoform014965	CIL0895S0110	new	372	Sense LncRNAs
Gene006846	CIL0895S0162,CIL0895S0163,CIL0895S0165,CIL0895S0167,CIL0895S0168,CIL0895S0169	Isoform014972	CIL0895S0162,CIL0895S0163,CIL0895S0165,CIL0895S0167,CIL0895S0168,CIL0895S0169	new	709	Antisense LncRNAs,Sense LncRNAs
Gene006846	CIL0895S0162,CIL0895S0163,CIL0895S0165,CIL0895S0167,CIL0895S0168,CIL0895S0169	Isoform014977	-	novel	711	Intergenic LncRNAs
Gene006846	CIL0895S0162,CIL0895S0163,CIL0895S0165,CIL0895S0167,CIL0895S0168,CIL0895S0169	Isoform014978	-	novel	2924	Intergenic LncRNAs
Gene006846	CIL0895S0162,CIL0895S0163,CIL0895S0165,CIL0895S0167,CIL0895S0168,CIL0895S0169	Isoform014980	CIL0895S0165	new	3830	Sense LncRNAs
Gene006846	CIL0895S0162,CIL0895S0163,CIL0895S0165,CIL0895S0167,CIL0895S0168,CIL0895S0169	Isoform014983	CIL0895S0165	new	530	Sense LncRNAs
Gene006852	CIL0895S0204	Isoform014994	CIL0895S0204	new	811	Sense LncRNAs
Gene006857	CIL0895S0237	Isoform015004	CIL0895S0237	new	2630	Intronic LncRNAs
Gene006871	-	Isoform015033	-	novel	3181	Intergenic LncRNAs
Gene006884	CIL0895S0152	Isoform015052	CIL0895S0152	new	2567	Intronic LncRNAs
Gene006887	CIL0895S0173	Isoform015061	CIL0895S0173	new	307	Sense LncRNAs
Gene006890	CIL0895S0183	Isoform015070	CIL0895S0183	new	634	Sense LncRNAs
Gene006904	-	Isoform015095	-	novel	414	Bidirectional LncRNAs
Gene006911	CIL0897S0025	Isoform015111	CIL0897S0025	new	513	Sense LncRNAs
Gene006920	CIL0897S0106	Isoform015134	CIL0897S0106	new	480	Sense LncRNAs
Gene006921	CIL0897S0131	Isoform015135	CIL0897S0131	new	304	Sense LncRNAs
Gene006929	CIL0897S0015	Isoform015163	CIL0897S0015	new	298	Sense LncRNAs
Gene006930	-	Isoform015165	-	novel	869	Bidirectional LncRNAs
Gene006944	CIL0897S0091	Isoform015206	CIL0897S0091	new	4760	Sense LncRNAs
Gene006947	CIL0897S0107	Isoform015212	CIL0897S0107	new	534	Sense LncRNAs
Gene006967	CIL0899S0079	Isoform015244	CIL0899S0079	new	346	Sense LncRNAs
Gene006974	-	Isoform015265	-	novel	338	Intergenic LncRNAs
Gene006978	CIL0899S0112	Isoform015280	CIL0899S0112	new	332	Sense LncRNAs
Gene007001	CIL0899S0182	Isoform015328	CIL0899S0182	new	3822	Sense LncRNAs
Gene007018	-	Isoform015362	-	novel	5570	Antisense LncRNAs
Gene007018	-	Isoform015363	-	novel	2516	Antisense LncRNAs
Gene007018	-	Isoform015364	-	novel	2562	Antisense LncRNAs
Gene007018	-	Isoform015365	-	novel	2843	Antisense LncRNAs
Gene007018	-	Isoform015366	-	novel	1841	Intergenic LncRNAs
Gene007027	-	Isoform015385	-	novel	193	Intergenic LncRNAs
Gene007035	CIL0899S0185	Isoform015408	CIL0899S0185	new	562	Sense LncRNAs
Gene007037	-	Isoform015411	-	novel	361	Intronic LncRNAs
Gene007041	CIL0900S0005,CIL0900S0007	Isoform015417	-	novel	1325	Antisense LncRNAs
Gene007044	CIL0902S0012,CIL0902S0013	Isoform015422	-	novel	4352	Intergenic LncRNAs
Gene007044	CIL0902S0012,CIL0902S0013	Isoform015426	CIL0902S0013	new	1752	Intronic LncRNAs
Gene007047	CIL0902S0017	Isoform015430	CIL0902S0017	new	1096	Sense LncRNAs
Gene007048	CIL0902S0027	Isoform015432	CIL0902S0027	new	198	Sense LncRNAs
Gene007054	CIL0902S0048,CIL0902S0049	Isoform015454	CIL0902S0049	new	2967	Intronic LncRNAs
Gene007056	CIL0902S0060	Isoform015462	CIL0902S0060	new	387	Sense LncRNAs
Gene007061	CIL0902S0075,CIL0902S0076	Isoform015470	CIL0902S0075	new	1164	Sense LncRNAs
Gene007062	-	Isoform015477	-	novel	2712	Intergenic LncRNAs
Gene007062	-	Isoform015478	-	novel	404	Intergenic LncRNAs
Gene007066	-	Isoform015482	-	novel	3411	Intergenic LncRNAs
Gene007068	CIL0902S0086	Isoform015484	CIL0902S0086	new	1354	Sense LncRNAs
Gene007068	CIL0902S0086	Isoform015485	CIL0902S0086	new	1578	Sense LncRNAs
Gene007068	CIL0902S0086	Isoform015486	CIL0902S0086	new	1578	Sense LncRNAs
Gene007071	CIL0902S0093	Isoform015490	CIL0902S0093	new	685	Sense LncRNAs
Gene007077	CIL0902S0113	Isoform015504	CIL0902S0113	new	255	Sense LncRNAs
Gene007087	CIL0902S0155	Isoform015523	-	novel	407	Other
Gene007093	CIL0902S0176	Isoform015537	CIL0902S0176	new	301	Sense LncRNAs
Gene007113	CIL0902S0019	Isoform015574	CIL0902S0019	new	2659	Intronic LncRNAs
Gene007125	CIL0902S0057,CIL0902S0058,CIL0902S0059	Isoform015598	-	novel	408	Bidirectional LncRNAs
Gene007127	CIL0902S0067	Isoform015620	CIL0902S0067	new	252	Sense LncRNAs
Gene007131	-	Isoform015632	-	novel	367	Intergenic LncRNAs
Gene007134	CIL0902S0097	Isoform015639	CIL0902S0097	new	332	Intronic LncRNAs
Gene007147	CIL0902S0142	Isoform015669	CIL0902S0142	new	344	Sense LncRNAs
Gene007148	CIL0902S0143	Isoform015672	CIL0902S0143	new	3012	Sense LncRNAs
Gene007162	CIL0906S0006	Isoform015697	-	novel	311	Other
Gene007176	-	Isoform015740	-	novel	3311	Intergenic LncRNAs
Gene007191	-	Isoform015777	-	novel	217	Antisense LncRNAs
Gene007196	CIL0906S0152	Isoform015796	CIL0906S0152	new	191	Sense LncRNAs
Gene007208	CIL0906S0024	Isoform015818	CIL0906S0024	new	3658	Sense LncRNAs
Gene007211	CIL0906S0039	Isoform015825	CIL0906S0039	new	308	Sense LncRNAs
Gene007217	-	Isoform015833	-	novel	377	Intergenic LncRNAs
Gene007218	CIL0906S0072	Isoform015834	CIL0906S0072	new	2171	Sense LncRNAs
Gene007249	CIL0908S0079	Isoform015900	CIL0908S0079	new	3583	Sense LncRNAs
Gene007255	-	Isoform015915	-	novel	2406	Intergenic LncRNAs
Gene007258	CIL0908S0158	Isoform015920	CIL0908S0158	new	2872	Sense LncRNAs
Gene007259	CIL0908S0160	Isoform015921	CIL0908S0160	new	660	Sense LncRNAs
Gene007264	CIL0908S0167	Isoform015950	CIL0908S0167	new	249	Sense LncRNAs
Gene007266	CIL0908S0174	Isoform015953	CIL0908S0174	new	251	Sense LncRNAs
Gene007271	CIL0908S0006	Isoform015971	CIL0908S0006	new	3917	Intronic LncRNAs
Gene007273	CIL0908S0013	Isoform015983	CIL0908S0013	new	1148	Sense LncRNAs
Gene007282	-	Isoform016009	-	novel	586	Bidirectional LncRNAs
Gene007282	-	Isoform016010	-	novel	190	Intergenic LncRNAs
Gene007292	-	Isoform016027	-	novel	1307	Intergenic LncRNAs
Gene007292	-	Isoform016028	-	novel	954	Intergenic LncRNAs
Gene007322	CIL0909S0029	Isoform016108	CIL0909S0029	new	3468	Intronic LncRNAs
Gene007327	CIL0909S0064	Isoform016126	CIL0909S0064	new	697	Sense LncRNAs
Gene007330	-	Isoform016133	-	novel	1598	Intergenic LncRNAs
Gene007332	CIL0909S0079	Isoform016141	CIL0909S0079	new	2585	Sense LncRNAs
Gene007344	CIL0909S0124	Isoform016177	CIL0909S0124	new	503	Sense LncRNAs
Gene007346	-	Isoform016181	-	novel	356	Intergenic LncRNAs
Gene007350	CIL0909S0141	Isoform016192	CIL0909S0141	new	913	Sense LncRNAs
Gene007363	CIL0909S0182,CIL0909S0183,CIL0909S0184,CIL0909S0185,CIL0909S0186,CIL0909S0191,CIL0909S0194	Isoform016217	CIL0909S0182,CIL0909S0183,CIL0909S0184,CIL0909S0185,CIL0909S0186,CIL0909S0191,CIL0909S0194	new	3073	Antisense LncRNAs,Sense LncRNAs
Gene007379	-	Isoform016249	-	novel	3464	Intronic LncRNAs
Gene007389	CIL0909S0057	Isoform016270	CIL0909S0057	new	914	Sense LncRNAs
Gene007391	CIL0909S0065	Isoform016273	CIL0909S0065	new	384	Sense LncRNAs
Gene007393	CIL0909S0070,CIL0909S0071	Isoform016278	-	novel	647	Other
Gene007406	-	Isoform016301	-	novel	928	Intergenic LncRNAs
Gene007406	-	Isoform016302	-	novel	796	Intergenic LncRNAs
Gene007406	-	Isoform016305	-	novel	691	Intergenic LncRNAs
Gene007418	-	Isoform016330	-	novel	3752	Intergenic LncRNAs
Gene007429	CIL0909S0220	Isoform016364	CIL0909S0220	new	534	Sense LncRNAs
Gene007439	-	Isoform016388	-	novel	2220	Intergenic LncRNAs
Gene007445	CIL0912S0033,CIL0912S0034	Isoform016395	-	novel	183	Other
Gene007447	CIL0912S0039,CIL0912S0041	Isoform016400	CIL0912S0039,CIL0912S0041	new	1011	Antisense LncRNAs,Sense LncRNAs
Gene007447	CIL0912S0039,CIL0912S0041	Isoform016402	CIL0912S0039	new	2536	Sense LncRNAs
Gene007447	CIL0912S0039,CIL0912S0041	Isoform016404	CIL0912S0041	new	852	Sense LncRNAs
Gene007447	CIL0912S0039,CIL0912S0041	Isoform016405	CIL0912S0041	new	587	Sense LncRNAs
Gene007447	CIL0912S0039,CIL0912S0041	Isoform016406	CIL0912S0041	new	1130	Sense LncRNAs
Gene007454	CIL0912S0067,CIL0912S0068,CIL0912S0069	Isoform016423	-	novel	422	Other
Gene007455	CIL0912S0070	Isoform016427	CIL0912S0070	new	334	Sense LncRNAs
Gene007456	CIL0912S0073	Isoform016430	CIL0912S0073	new	234	Sense LncRNAs
Gene007460	CIL0912S0091	Isoform016435	CIL0912S0091	new	250	Sense LncRNAs
Gene007471	-	Isoform016456	-	novel	2568	Intergenic LncRNAs
Gene007479	-	Isoform016466	-	novel	157	Other
Gene007493	-	Isoform016496	-	novel	2306	Antisense LncRNAs
Gene007513	CIL0912S0130	Isoform016541	CIL0912S0130	new	243	Sense LncRNAs
Gene007514	CIL0912S0130	Isoform016542	CIL0912S0130	new	248	Sense LncRNAs
Gene007517	CIL0912S0139	Isoform016548	CIL0912S0139	new	1052	Sense LncRNAs
Gene007523	CIL0912S0161	Isoform016573	CIL0912S0161	new	2782	Intronic LncRNAs
Gene007537	CIL0914S0024,CIL0914S0025	Isoform016608	CIL0914S0025	new	225	Sense LncRNAs
Gene007557	-	Isoform016669	-	novel	631	Intergenic LncRNAs
Gene007567	CIL0914S0013	Isoform016693	CIL0914S0013	new	360	Sense LncRNAs
Gene007587	CIL0914S0117	Isoform016742	-	novel	163	Intergenic LncRNAs
Gene007593	CIL0914S0137	Isoform016761	CIL0914S0137	new	190	Sense LncRNAs
Gene007598	-	Isoform016776	-	novel	2599	Intergenic LncRNAs
Gene007599	-	Isoform016777	-	novel	225	Intergenic LncRNAs
Gene007611	CIL0917S0057	Isoform016798	-	novel	235	Other
Gene007640	CIL0917S0020	Isoform016850	CIL0917S0020	new	726	Sense LncRNAs
Gene007648	-	Isoform016867	-	novel	1024	Antisense LncRNAs
Gene007652	CIL0917S0068	Isoform016875	CIL0917S0068	new	230	Sense LncRNAs
Gene007654	CIL0917S0076	Isoform016880	CIL0917S0076	new	622	Sense LncRNAs
Gene007667	CIL0917S0141	Isoform016912	CIL0917S0141	new	348	Sense LncRNAs
Gene007675	CIL0919S0010	Isoform016924	CIL0919S0010	new	233	Sense LncRNAs
Gene007690	-	Isoform016951	-	novel	569	Intergenic LncRNAs
Gene007706	-	Isoform016979	-	novel	219	Intergenic LncRNAs
Gene007715	CIL0919S0155	Isoform016992	CIL0919S0155	new	2129	Sense LncRNAs
Gene007718	-	Isoform016995	-	novel	250	Intronic LncRNAs
Gene007726	CIL0919S0198	Isoform017020	CIL0919S0198	new	155	Sense LncRNAs
Gene007728	-	Isoform017023	-	novel	715	Other
Gene007741	-	Isoform017055	-	novel	815	Antisense LncRNAs
Gene007743	CIL0919S0025	Isoform017057	CIL0919S0025	new	1742	Antisense LncRNAs,Sense LncRNAs
Gene007763	CIL0919S0091	Isoform017089	CIL0919S0091	new	3023	Sense LncRNAs
Gene007763	CIL0919S0091	Isoform017090	CIL0919S0091	new	2958	Sense LncRNAs
Gene007763	CIL0919S0091	Isoform017091	CIL0919S0091	new	2904	Sense LncRNAs
Gene007783	CIL0919S0170	Isoform017148	CIL0919S0170	new	206	Sense LncRNAs
Gene007797	CIL0921S0046	Isoform017175	CIL0921S0046	new	1451	Sense LncRNAs
Gene007797	CIL0921S0046	Isoform017176	CIL0921S0046	new	1097	Sense LncRNAs
Gene007824	-	Isoform017234	-	novel	363	Intergenic LncRNAs
Gene007834	-	Isoform017258	-	novel	239	Intergenic LncRNAs
Gene007835	CIL0921S0117	Isoform017260	CIL0921S0117	new	3147	Sense LncRNAs
Gene007859	CIL0922S0073,CIL0922S0074,CIL0922S0076,CIL0922S0077,CIL0922S0078,CIL0922S0079,CIL0922S0080,CIL0922S0081,CIL0922S0082,CIL0922S0083	Isoform017329	CIL0922S0073	new	937	Sense LncRNAs
Gene007859	CIL0922S0073,CIL0922S0074,CIL0922S0076,CIL0922S0077,CIL0922S0078,CIL0922S0079,CIL0922S0080,CIL0922S0081,CIL0922S0082,CIL0922S0083	Isoform017332	CIL0922S0074	new	510	Sense LncRNAs
Gene007859	CIL0922S0073,CIL0922S0074,CIL0922S0076,CIL0922S0077,CIL0922S0078,CIL0922S0079,CIL0922S0080,CIL0922S0081,CIL0922S0082,CIL0922S0083	Isoform017333	CIL0922S0074	new	4121	Sense LncRNAs
Gene007859	CIL0922S0073,CIL0922S0074,CIL0922S0076,CIL0922S0077,CIL0922S0078,CIL0922S0079,CIL0922S0080,CIL0922S0081,CIL0922S0082,CIL0922S0083	Isoform017334	CIL0922S0074	new	3961	Sense LncRNAs
Gene007861	CIL0922S0085	Isoform017339	CIL0922S0085	new	850	Sense LncRNAs
Gene007862	CIL0922S0088	Isoform017340	CIL0922S0088	new	528	Sense LncRNAs
Gene007886	CIL0922S0157	Isoform017382	-	novel	221	Bidirectional LncRNAs
Gene007891	CIL0922S0190	Isoform017388	CIL0922S0190	new	519	Sense LncRNAs
Gene007920	CIL0922S0106	Isoform017475	CIL0922S0106	new	2042	Sense LncRNAs
Gene007924	CIL0922S0116	Isoform017486	CIL0922S0116	new	282	Sense LncRNAs
Gene007932	CIL0922S0145	Isoform017500	CIL0922S0145	new	208	Sense LncRNAs
Gene007972	CIL0923S0008	Isoform017593	CIL0923S0008	new	2771	Sense LncRNAs
Gene007975	CIL0923S0018,CIL0923S0019	Isoform017606	CIL0923S0019	new	4623	Sense LncRNAs
Gene007994	CIL0923S0068	Isoform017638	CIL0923S0068	new	267	Sense LncRNAs
Gene007995	CIL0923S0069	Isoform017642	CIL0923S0069	new	247	Sense LncRNAs
Gene007998	CIL0923S0077	Isoform017648	-	novel	274	Other
Gene007999	CIL0923S0080,CIL0923S0081,CIL0923S0083,CIL0923S0085,CIL0923S0088,CIL0923S0090,CIL0923S0091,CIL0923S0095,CIL0923S0096,CIL0923S0097,CIL0923S0098,CIL0923S0099,CIL0923S0103,CIL0923S0107,CIL0923S0108,CIL0923S0109,CIL0923S0110,CIL0923S0112,CIL0923S0114,CIL0923S0116,CIL0923S0117,CIL0923S0119,CIL0923S0120,CIL0923S0121,CIL0923S0124,CIL0923S0125	Isoform017653	CIL0923S0110	new	377	Sense LncRNAs
Gene007999	CIL0923S0080,CIL0923S0081,CIL0923S0083,CIL0923S0085,CIL0923S0088,CIL0923S0090,CIL0923S0091,CIL0923S0095,CIL0923S0096,CIL0923S0097,CIL0923S0098,CIL0923S0099,CIL0923S0103,CIL0923S0107,CIL0923S0108,CIL0923S0109,CIL0923S0110,CIL0923S0112,CIL0923S0114,CIL0923S0116,CIL0923S0117,CIL0923S0119,CIL0923S0120,CIL0923S0121,CIL0923S0124,CIL0923S0125	Isoform017654	-	novel	220	Intergenic LncRNAs
Gene007999	CIL0923S0080,CIL0923S0081,CIL0923S0083,CIL0923S0085,CIL0923S0088,CIL0923S0090,CIL0923S0091,CIL0923S0095,CIL0923S0096,CIL0923S0097,CIL0923S0098,CIL0923S0099,CIL0923S0103,CIL0923S0107,CIL0923S0108,CIL0923S0109,CIL0923S0110,CIL0923S0112,CIL0923S0114,CIL0923S0116,CIL0923S0117,CIL0923S0119,CIL0923S0120,CIL0923S0121,CIL0923S0124,CIL0923S0125	Isoform017658	CIL0923S0121	new	405	Sense LncRNAs
Gene008035	CIL0923S0043	Isoform017784	CIL0923S0043	new	303	Sense LncRNAs
Gene008043	-	Isoform017797	-	novel	2406	Intronic LncRNAs
Gene008071	CIL0923S0147	Isoform017843	CIL0923S0147	new	273	Sense LncRNAs
Gene008081	CIL0923S0182	Isoform017863	CIL0923S0182	new	174	Sense LncRNAs
Gene008083	-	Isoform017868	-	novel	1099	Intergenic LncRNAs
Gene008112	CIL0923S0267	Isoform017924	CIL0923S0267	new	3811	Sense LncRNAs
Gene008117	CIL0925S0004,CIL0925S0005,CIL0925S0007,CIL0925S0009,CIL0925S0010	Isoform017930	CIL0925S0004,CIL0925S0005,CIL0925S0007,CIL0925S0009,CIL0925S0010	new	2874	Antisense LncRNAs,Sense LncRNAs
Gene008124	CIL0925S0083,CIL0925S0084	Isoform017947	CIL0925S0083,CIL0925S0084	new	2082	Sense LncRNAs
Gene008130	-	Isoform017956	-	novel	4071	Intergenic LncRNAs
Gene008141	CIL0925S0078	Isoform017978	CIL0925S0078	new	3240	Sense LncRNAs
Gene008173	-	Isoform018040	-	novel	240	Intergenic LncRNAs
Gene008177	CIL0929S0068	Isoform018047	CIL0929S0068	new	237	Sense LncRNAs
Gene008183	CIL0929S0092	Isoform018060	CIL0929S0092	new	186	Intronic LncRNAs,Sense LncRNAs
Gene008189	CIL0929S0125	Isoform018075	CIL0929S0125	new	182	Sense LncRNAs
Gene008189	CIL0929S0125	Isoform018077	CIL0929S0125	new	1485	Intronic LncRNAs
Gene008200	CIL0929S0171	Isoform018097	CIL0929S0171	new	1096	Sense LncRNAs
Gene008207	-	Isoform018105	-	novel	367	Antisense LncRNAs
Gene008230	CIL0929S0100,CIL0929S0101	Isoform018157	-	novel	182	Bidirectional LncRNAs
Gene008246	CIL0929S0157	Isoform018184	CIL0929S0157	new	776	Sense LncRNAs
Gene008261	-	Isoform018211	-	novel	326	Intronic LncRNAs
Gene008268	CIL0935S0015	Isoform018224	CIL0935S0015	new	2796	Sense LncRNAs
Gene008295	CIL0935S0011	Isoform018288	CIL0935S0011	new	3048	Sense LncRNAs
Gene008296	CIL0935S0016	Isoform018289	CIL0935S0016	new	255	Sense LncRNAs
Gene008296	CIL0935S0016	Isoform018291	CIL0935S0016	new	1257	Sense LncRNAs
Gene008296	CIL0935S0016	Isoform018292	CIL0935S0016	new	2978	Sense LncRNAs
Gene008303	CIL0935S0059	Isoform018301	CIL0935S0059	new	600	Sense LncRNAs
Gene008304	CIL0935S0061	Isoform018302	CIL0935S0061	new	2917	Sense LncRNAs
Gene008305	CIL0935S0077,CIL0935S0078	Isoform018316	CIL0935S0078	new	2787	Sense LncRNAs
Gene008321	CIL0935S0139	Isoform018351	-	novel	279	Other
Gene008326	-	Isoform018359	-	novel	362	Other
Gene008330	CIL0937S0013	Isoform018367	CIL0937S0013	new	291	Sense LncRNAs
Gene008337	-	Isoform018382	-	novel	437	Intergenic LncRNAs
Gene008341	CIL0937S0045	Isoform018394	-	novel	906	Other
Gene008349	-	Isoform018418	-	novel	619	Antisense LncRNAs
Gene008362	-	Isoform018443	-	novel	3040	Other
Gene008368	-	Isoform018455	-	novel	3575	Antisense LncRNAs
Gene008389	-	Isoform018492	-	novel	2352	Intergenic LncRNAs
Gene008400	CIL0937S0138	Isoform018509	CIL0937S0138	new	289	Sense LncRNAs
Gene008403	-	Isoform018514	-	novel	235	Bidirectional LncRNAs
Gene008404	CIL0937S0151	Isoform018515	CIL0937S0151	new	564	Sense LncRNAs
Gene008409	CIL0937S0167	Isoform018530	CIL0937S0167	new	515	Sense LncRNAs
Gene008415	CIL0938S0045	Isoform018549	CIL0938S0045	new	332	Sense LncRNAs
Gene008417	CIL0938S0061	Isoform018559	CIL0938S0061	new	194	Sense LncRNAs
Gene008418	CIL0938S0063	Isoform018562	CIL0938S0063	new	4243	Sense LncRNAs
Gene008419	CIL0938S0065	Isoform018587	CIL0938S0065	new	1714	Sense LncRNAs
Gene008429	CIL0938S0097	Isoform018610	CIL0938S0097	new	207	Sense LncRNAs
Gene008430	CIL0938S0098	Isoform018611	CIL0938S0098	new	1388	Sense LncRNAs
Gene008431	CIL0938S0101	Isoform018617	CIL0938S0101	new	434	Sense LncRNAs
Gene008434	CIL0938S0111	Isoform018623	CIL0938S0111	new	291	Sense LncRNAs
Gene008442	CIL0938S0135	Isoform018641	CIL0938S0135	new	1083	Sense LncRNAs
Gene008443	CIL0938S0139	Isoform018648	CIL0938S0139	new	436	Sense LncRNAs
Gene008453	CIL0938S0015	Isoform018676	CIL0938S0015	new	444	Sense LncRNAs
Gene008453	CIL0938S0015	Isoform018677	CIL0938S0015	new	497	Sense LncRNAs
Gene008454	-	Isoform018678	-	novel	1103	Antisense LncRNAs
Gene008470	CIL0938S0127	Isoform018706	CIL0938S0127	new	371	Sense LncRNAs
Gene008481	CIL0940S0035	Isoform018730	CIL0940S0035	new	246	Sense LncRNAs
Gene008483	-	Isoform018732	-	novel	2286	Other
Gene008489	CIL0940S0079,CIL0940S0087,CIL0940S0090,CIL0940S0092,CIL0940S0094,CIL0940S0100,CIL0940S0102,CIL0940S0103,CIL0940S0106,CIL0940S0107,CIL0940S0108,CIL0940S0111,CIL0940S0113,CIL0940S0114,CIL0940S0115,CIL0940S0118,CIL0940S0119	Isoform018768	-	novel	299	Intergenic LncRNAs
Gene008497	CIL0940S0161	Isoform018784	CIL0940S0161	new	339	Sense LncRNAs
Gene008508	CIL0940S0186	Isoform018803	CIL0940S0186	new	348	Sense LncRNAs
Gene008524	CIL0940S0043	Isoform018834	CIL0940S0043	new	176	Sense LncRNAs
Gene008569	CIL0942S0025	Isoform018924	CIL0942S0025	new	444	Sense LncRNAs
Gene008577	CIL0942S0068	Isoform018937	CIL0942S0068	new	411	Sense LncRNAs
Gene008592	CIL0942S0112	Isoform018969	CIL0942S0112	new	1500	Sense LncRNAs
Gene008597	CIL0942S0125	Isoform018986	CIL0942S0125	new	2582	Sense LncRNAs
Gene008597	CIL0942S0125	Isoform018989	CIL0942S0125	new	3563	Sense LncRNAs
Gene008598	-	Isoform018991	-	novel	277	Antisense LncRNAs
Gene008599	CIL0942S0140	Isoform018994	CIL0942S0140	new	2665	Intronic LncRNAs
Gene008600	-	Isoform018995	-	novel	203	Bidirectional LncRNAs
Gene008607	CIL0942S0183	Isoform019010	CIL0942S0183	new	437	Sense LncRNAs
Gene008610	CIL0942S0197	Isoform019015	-	novel	286	Other
Gene008645	CIL0942S0073	Isoform019077	CIL0942S0073	new	221	Sense LncRNAs
Gene008649	CIL0942S0082,CIL0942S0083,CIL0942S0086,CIL0942S0088,CIL0942S0089,CIL0942S0091,CIL0942S0092,CIL0942S0094,CIL0942S0095,CIL0942S0096	Isoform019097	CIL0942S0091	new	354	Sense LncRNAs
Gene008649	CIL0942S0082,CIL0942S0083,CIL0942S0086,CIL0942S0088,CIL0942S0089,CIL0942S0091,CIL0942S0092,CIL0942S0094,CIL0942S0095,CIL0942S0096	Isoform019105	CIL0942S0095	new	932	Sense LncRNAs
Gene008660	-	Isoform019138	-	novel	271	Intergenic LncRNAs
Gene008661	-	Isoform019139	-	novel	384	Antisense LncRNAs
Gene008700	CIL0945S0053	Isoform019229	CIL0945S0053	new	350	Sense LncRNAs
Gene008703	-	Isoform019233	-	novel	899	Intergenic LncRNAs
Gene008712	CIL0945S0085	Isoform019247	CIL0945S0085	new	222	Sense LncRNAs
Gene008721	CIL0945S0149	Isoform019267	CIL0945S0149	new	2360	Intronic LncRNAs
Gene008729	-	Isoform019277	-	novel	888	Intergenic LncRNAs
Gene008733	-	Isoform019285	-	novel	502	Intergenic LncRNAs
Gene008755	CIL0945S0148	Isoform019326	CIL0945S0148	new	7228	Sense LncRNAs
Gene008762	CIL0946S0010	Isoform019343	CIL0946S0010	new	169	Sense LncRNAs
Gene008769	CIL0946S0031	Isoform019355	CIL0946S0031	new	3060	Sense LncRNAs
Gene008779	-	Isoform019370	-	novel	527	Intergenic LncRNAs
Gene008793	-	Isoform019388	-	novel	3853	Antisense LncRNAs
Gene008806	CIL0946S0128	Isoform019412	-	novel	212	Other
Gene008808	CIL0946S0133	Isoform019419	CIL0946S0133	new	398	Sense LncRNAs
Gene008809	CIL0948S0010,CIL0948S0011	Isoform019425	CIL0948S0010	new	444	Sense LncRNAs
Gene008810	-	Isoform019429	-	novel	371	Intronic LncRNAs
Gene008831	CIL0948S0103	Isoform019485	CIL0948S0103	new	610	Sense LncRNAs
Gene008831	CIL0948S0103	Isoform019486	CIL0948S0103	new	755	Sense LncRNAs
Gene008855	-	Isoform019552	-	novel	560	Bidirectional LncRNAs
Gene008891	CIL0948S0068	Isoform019611	CIL0948S0068	new	4371	Sense LncRNAs
Gene008905	CIL0948S0128	Isoform019641	CIL0948S0128	new	719	Sense LncRNAs
Gene008911	CIL0948S0144	Isoform019651	CIL0948S0144	new	318	Sense LncRNAs
Gene008923	CIL0948S0180	Isoform019684	CIL0948S0180	new	163	Sense LncRNAs
Gene008925	CIL0948S0185	Isoform019686	CIL0948S0185	new	1295	Sense LncRNAs
Gene008935	CIL0948S0221	Isoform019713	CIL0948S0221	new	221	Sense LncRNAs
Gene008939	-	Isoform019723	-	novel	687	Bidirectional LncRNAs
Gene008943	CIL0951S0004,CIL0951S0005,CIL0951S0006,CIL0951S0007,CIL0951S0008	Isoform019730	CIL0951S0004,CIL0951S0005,CIL0951S0006,CIL0951S0007,CIL0951S0008	new	3021	Antisense LncRNAs,Sense LncRNAs
Gene008948	-	Isoform019756	-	novel	533	Antisense LncRNAs
Gene008975	CIL0951S0150	Isoform019812	CIL0951S0150	new	2218	Sense LncRNAs
Gene008977	-	Isoform019814	-	novel	2488	Intergenic LncRNAs
Gene008980	CIL0951S0010,CIL0951S0011	Isoform019820	CIL0951S0010,CIL0951S0011	new	3089	Sense LncRNAs
Gene008983	-	Isoform019824	-	novel	563	Intergenic LncRNAs
Gene008995	CIL0951S0088	Isoform019849	CIL0951S0088	new	156	Sense LncRNAs
Gene009002	-	Isoform019859	-	novel	672	Intergenic LncRNAs
Gene009004	-	Isoform019861	-	novel	3060	Intergenic LncRNAs
Gene009019	-	Isoform019888	-	novel	921	Intergenic LncRNAs
Gene009027	CIL0953S0002	Isoform019902	CIL0953S0002	new	2433	Sense LncRNAs
Gene009034	CIL0953S0037,CIL0953S0038	Isoform019928	-	novel	731	Antisense LncRNAs
Gene009035	CIL0953S0063,CIL0953S0064	Isoform019934	-	novel	649	Intergenic LncRNAs
Gene009039	-	Isoform019939	-	novel	422	Other
Gene009049	-	Isoform019955	-	novel	2384	Intergenic LncRNAs
Gene009058	CIL0957S0046	Isoform019974	CIL0957S0046	new	213	Sense LncRNAs
Gene009060	CIL0957S0049	Isoform019977	CIL0957S0049	new	387	Sense LncRNAs
Gene009067	CIL0957S0080	Isoform019994	CIL0957S0080	new	2645	Sense LncRNAs
Gene009067	CIL0957S0080	Isoform019997	CIL0957S0080	new	774	Intronic LncRNAs
Gene009069	CIL0957S0090,CIL0957S0091	Isoform020001	CIL0957S0090,CIL0957S0091	new	3964	Antisense LncRNAs,Sense LncRNAs
Gene009077	CIL0957S0134	Isoform020014	CIL0957S0134	new	3877	Sense LncRNAs
Gene009081	CIL0957S0146	Isoform020028	CIL0957S0146	new	540	Intronic LncRNAs
Gene009089	CIL0957S0181	Isoform020052	CIL0957S0181	new	1337	Sense LncRNAs
Gene009090	CIL0957S0183,CIL0957S0184	Isoform020056	CIL0957S0183	new	1665	Sense LncRNAs
Gene009090	CIL0957S0183,CIL0957S0184	Isoform020064	CIL0957S0183	new	399	Sense LncRNAs
Gene009092	CIL0957S0192,CIL0957S0193	Isoform020069	CIL0957S0192	new	2035	Sense LncRNAs
Gene009093	-	Isoform020073	-	novel	2155	Intergenic LncRNAs
Gene009105	CIL0957S0053	Isoform020108	CIL0957S0053	new	1080	Sense LncRNAs
Gene009106	CIL0957S0055	Isoform020111	CIL0957S0055	new	235	Sense LncRNAs
Gene009114	CIL0957S0092	Isoform020125	CIL0957S0092	new	2291	Sense LncRNAs
Gene009117	-	Isoform020131	-	novel	807	Intergenic LncRNAs
Gene009136	CIL0957S0149	Isoform020172	CIL0957S0149	new	2729	Antisense LncRNAs,Sense LncRNAs
Gene009137	CIL0957S0159	Isoform020173	CIL0957S0159	new	271	Sense LncRNAs
Gene009146	CIL0957S0189	Isoform020192	CIL0957S0189	new	428	Sense LncRNAs
Gene009148	CIL0086S0005,CIL0086S0006	Isoform020196	-	novel	317	Intergenic LncRNAs
Gene009191	-	Isoform020367	-	novel	407	Intergenic LncRNAs
Gene009203	CIL0962S0089	Isoform020396	CIL0962S0089	new	888	Sense LncRNAs
Gene009203	CIL0962S0089	Isoform020397	CIL0962S0089	new	1058	Sense LncRNAs
Gene009215	CIL0962S0137	Isoform020427	-	novel	187	Other
Gene009222	CIL0967S0004,CIL0967S0005,CIL0967S0006,CIL0967S0009,CIL0967S0015,CIL0967S0016,CIL0967S0017,CIL0967S0019,CIL0967S0020,CIL0967S0022,CIL0967S0024,CIL0967S0025,CIL0967S0026,CIL0967S0027,CIL0967S0032,CIL0967S0033,CIL0967S0035,CIL0967S0037,CIL0967S0039,CIL0967S0040,CIL0967S0041,CIL0967S0043,CIL0967S0052,CIL0967S0054,CIL0967S0055,CIL0967S0056,CIL0967S0057,CIL0967S0058,CIL0967S0059,CIL0967S0061,CIL0967S0…	Isoform020450	CIL0967S0022	new	902	Sense LncRNAs
Gene009222	CIL0967S0004,CIL0967S0005,CIL0967S0006,CIL0967S0009,CIL0967S0015,CIL0967S0016,CIL0967S0017,CIL0967S0019,CIL0967S0020,CIL0967S0022,CIL0967S0024,CIL0967S0025,CIL0967S0026,CIL0967S0027,CIL0967S0032,CIL0967S0033,CIL0967S0035,CIL0967S0037,CIL0967S0039,CIL0967S0040,CIL0967S0041,CIL0967S0043,CIL0967S0052,CIL0967S0054,CIL0967S0055,CIL0967S0056,CIL0967S0057,CIL0967S0058,CIL0967S0059,CIL0967S0061,CIL0967S0…	Isoform020451	CIL0967S0022	new	426	Sense LncRNAs
Gene009222	CIL0967S0004,CIL0967S0005,CIL0967S0006,CIL0967S0009,CIL0967S0015,CIL0967S0016,CIL0967S0017,CIL0967S0019,CIL0967S0020,CIL0967S0022,CIL0967S0024,CIL0967S0025,CIL0967S0026,CIL0967S0027,CIL0967S0032,CIL0967S0033,CIL0967S0035,CIL0967S0037,CIL0967S0039,CIL0967S0040,CIL0967S0041,CIL0967S0043,CIL0967S0052,CIL0967S0054,CIL0967S0055,CIL0967S0056,CIL0967S0057,CIL0967S0058,CIL0967S0059,CIL0967S0061,CIL0967S0…	Isoform020498	CIL0967S0106	new	354	Sense LncRNAs
Gene009227	CIL0967S0188,CIL0967S0189	Isoform020546	CIL0967S0189	new	2738	Sense LncRNAs
Gene009228	-	Isoform020555	-	novel	390	Bidirectional LncRNAs
Gene009231	-	Isoform020564	-	novel	1982	Antisense LncRNAs
Gene009232	CIL0967S0212,CIL0967S0213	Isoform020566	CIL0967S0213	new	299	Intronic LncRNAs
Gene009240	CIL0967S0232	Isoform020577	CIL0967S0232	new	2682	Sense LncRNAs
Gene009266	-	Isoform020646	-	novel	983	Intergenic LncRNAs
Gene009273	CIL0967S0142	Isoform020658	CIL0967S0142	new	598	Sense LncRNAs
Gene009277	CIL0967S0162	Isoform020665	CIL0967S0162	new	244	Sense LncRNAs
Gene009305	CIL0970S0045	Isoform020727	CIL0970S0045	new	380	Sense LncRNAs
Gene009308	-	Isoform020730	-	novel	359	Bidirectional LncRNAs
Gene009332	CIL0970S0134	Isoform020777	CIL0970S0134	new	801	Sense LncRNAs
Gene009332	CIL0970S0134	Isoform020778	CIL0970S0134	new	3179	Sense LncRNAs
Gene009363	CIL0970S0111	Isoform020843	-	novel	619	Bidirectional LncRNAs
Gene009363	CIL0970S0111	Isoform020846	-	novel	143	Other
Gene009381	CIL0972S0033	Isoform020879	CIL0972S0033	new	3075	Sense LncRNAs
Gene009386	-	Isoform020889	-	novel	750	Antisense LncRNAs
Gene009388	CIL0972S0054	Isoform020894	CIL0972S0054	new	187	Sense LncRNAs
Gene009391	CIL0972S0061	Isoform020900	CIL0972S0061	new	3651	Sense LncRNAs
Gene009397	-	Isoform020919	-	novel	546	Intergenic LncRNAs
Gene009399	-	Isoform020921	-	novel	1143	Antisense LncRNAs
Gene009400	-	Isoform020922	-	novel	244	Antisense LncRNAs
Gene009401	CIL0972S0082	Isoform020923	CIL0972S0082	new	1067	Sense LncRNAs
Gene009416	-	Isoform020946	-	novel	408	Intergenic LncRNAs
Gene009434	-	Isoform020993	-	novel	404	Intergenic LncRNAs
Gene009436	-	Isoform020996	-	novel	1155	Antisense LncRNAs
Gene009450	-	Isoform021021	-	novel	1926	Intronic LncRNAs
Gene009456	CIL0974S0077	Isoform021030	CIL0974S0077	new	195	Sense LncRNAs
Gene009464	-	Isoform021041	-	novel	298	Intergenic LncRNAs
Gene009468	-	Isoform021045	-	novel	2865	Antisense LncRNAs
Gene009468	-	Isoform021046	-	novel	2677	Antisense LncRNAs
Gene009468	-	Isoform021047	-	novel	859	Intergenic LncRNAs
Gene009470	CIL0974S0062	Isoform021053	CIL0974S0062	new	4745	Sense LncRNAs
Gene009480	CIL0976S0025	Isoform021066	CIL0976S0025	new	569	Sense LncRNAs
Gene009485	-	Isoform021072	-	novel	3019	Intronic LncRNAs
Gene009503	CIL0976S0049	Isoform021139	CIL0976S0049	new	3011	Intronic LncRNAs
Gene009505	-	Isoform021141	-	novel	2734	Antisense LncRNAs
Gene009510	CIL0976S0074,CIL0976S0075	Isoform021152	CIL0976S0074	new	492	Intronic LncRNAs
Gene009522	CIL0976S0129	Isoform021189	-	novel	353	Intergenic LncRNAs
Gene009530	-	Isoform021210	-	novel	473	Bidirectional LncRNAs
Gene009537	CIL0978S0053,CIL0978S0054	Isoform021225	CIL0978S0053,CIL0978S0054	new	876	Sense LncRNAs
Gene009555	CIL0978S0137	Isoform021272	CIL0978S0137	new	266	Sense LncRNAs
Gene009578	-	Isoform021328	-	novel	512	Intergenic LncRNAs
Gene009619	-	Isoform021440	-	novel	320	Intergenic LncRNAs
Gene009639	CIL0979S0101	Isoform021482	CIL0979S0101	new	354	Intronic LncRNAs
Gene009640	CIL0979S0103	Isoform021483	-	novel	220	Other
Gene009643	CIL0979S0115	Isoform021487	CIL0979S0115	new	2465	Sense LncRNAs
Gene009645	CIL0979S0126,CIL0979S0127	Isoform021495	CIL0979S0126	new	185	Intronic LncRNAs
Gene009650	CIL0979S0153	Isoform021509	CIL0979S0153	new	650	Sense LncRNAs
Gene009652	CIL0979S0163	Isoform021519	CIL0979S0163	new	300	Sense LncRNAs
Gene009658	-	Isoform021532	-	novel	1633	Bidirectional LncRNAs
Gene009661	CIL0979S0180	Isoform021537	CIL0979S0180	new	287	Sense LncRNAs
Gene009666	CIL0979S0002	Isoform021547	CIL0979S0002	new	2334	Sense LncRNAs
Gene009675	-	Isoform021569	-	novel	615	Intergenic LncRNAs
Gene009700	CIL0979S0156	Isoform021618	CIL0979S0156	new	1021	Sense LncRNAs
Gene009709	CIL0982S0007	Isoform021633	CIL0982S0007	new	3316	Sense LncRNAs
Gene009709	CIL0982S0007	Isoform021634	CIL0982S0007	new	1360	Sense LncRNAs
Gene009720	-	Isoform021661	-	novel	532	Intergenic LncRNAs
Gene009727	-	Isoform021673	-	novel	2369	Intronic LncRNAs
Gene009730	CIL0982S0091	Isoform021679	CIL0982S0091	new	346	Sense LncRNAs
Gene009731	CIL0982S0092,CIL0982S0093	Isoform021680	-	novel	764	Intergenic LncRNAs
Gene009738	CIL0982S0122	Isoform021691	CIL0982S0122	new	3055	Sense LncRNAs
Gene009747	CIL0982S0005	Isoform021715	CIL0982S0005	new	252	Sense LncRNAs
Gene009758	CIL0982S0042	Isoform021735	CIL0982S0042	new	363	Sense LncRNAs
Gene009759	CIL0982S0043	Isoform021736	CIL0982S0043	new	314	Intronic LncRNAs
Gene009792	CIL0984S0024	Isoform021790	CIL0984S0024	new	311	Sense LncRNAs
Gene009795	CIL0984S0037	Isoform021795	CIL0984S0037	new	1488	Sense LncRNAs
Gene009796	-	Isoform021796	-	novel	530	Antisense LncRNAs
Gene009800	CIL0984S0065	Isoform021804	CIL0984S0065	new	289	Sense LncRNAs
Gene009808	-	Isoform021814	-	novel	857	Bidirectional LncRNAs
Gene009810	CIL0984S0104	Isoform021820	CIL0984S0104	new	221	Sense LncRNAs
Gene009814	CIL0984S0119	Isoform021827	CIL0984S0119	new	395	Sense LncRNAs
Gene009818	-	Isoform021837	-	novel	2242	Intergenic LncRNAs
Gene009825	-	Isoform021848	-	novel	276	Other
Gene009831	-	Isoform021863	-	novel	1111	Antisense LncRNAs
Gene009847	CIL0087S0011	Isoform021884	CIL0087S0011	new	259	Sense LncRNAs
Gene009856	-	Isoform021907	-	novel	1210	Intergenic LncRNAs
Gene009856	-	Isoform021908	-	novel	817	Intergenic LncRNAs
Gene009883	-	Isoform021959	-	novel	406	Intergenic LncRNAs
Gene009885	CIL0987S0098	Isoform021962	-	novel	168	Other
Gene009886	CIL0987S0099	Isoform021969	CIL0987S0099	new	226	Sense LncRNAs
Gene009906	CIL0987S0157	Isoform022022	CIL0987S0157	new	330	Sense LncRNAs
Gene009910	-	Isoform022036	-	novel	3128	Antisense LncRNAs
Gene009935	CIL0987S0064	Isoform022077	CIL0987S0064	new	4206	Sense LncRNAs
Gene009941	-	Isoform022088	-	novel	287	Intergenic LncRNAs
Gene009947	CIL0987S0133,CIL0987S0134	Isoform022103	-	novel	429	Bidirectional LncRNAs
Gene009954	-	Isoform022116	-	novel	615	Intergenic LncRNAs
Gene009966	CIL0989S0019	Isoform022135	CIL0989S0019	new	354	Intronic LncRNAs
Gene009977	-	Isoform022156	-	novel	470	Intergenic LncRNAs
Gene009990	CIL0989S0066	Isoform022190	CIL0989S0066	new	2079	Sense LncRNAs
Gene009990	CIL0989S0066	Isoform022191	CIL0989S0066	new	3343	Sense LncRNAs
Gene009995	CIL0989S0086	Isoform022199	CIL0989S0086	new	4041	Sense LncRNAs
Gene010016	CIL0990S0112	Isoform022247	CIL0990S0112	new	445	Sense LncRNAs
Gene010038	CIL0990S0175	Isoform022304	CIL0990S0175	new	299	Sense LncRNAs
Gene010081	CIL0992S0019,CIL0992S0020	Isoform022388	CIL0992S0019,CIL0992S0020	new	1231	Sense LncRNAs
Gene010082	CIL0992S0022	Isoform022393	CIL0992S0022	new	747	Sense LncRNAs
Gene010083	-	Isoform022397	-	novel	261	Antisense LncRNAs
Gene010093	-	Isoform022410	-	novel	322	Intergenic LncRNAs
Gene010106	-	Isoform022438	-	novel	3607	Other
Gene010113	CIL0992S0119	Isoform022454	CIL0992S0119	new	1728	Sense LncRNAs
Gene010113	CIL0992S0119	Isoform022456	CIL0992S0119	new	775	Sense LncRNAs
Gene010113	CIL0992S0119	Isoform022457	CIL0992S0119	new	355	Sense LncRNAs
Gene010114	CIL0992S0005	Isoform022458	CIL0992S0005	new	1047	Sense LncRNAs
Gene010130	-	Isoform022483	-	novel	815	Antisense LncRNAs
Gene010136	-	Isoform022493	-	novel	216	Intronic LncRNAs
Gene010139	CIL0992S0113	Isoform022496	CIL0992S0113	new	3003	Sense LncRNAs
Gene010140	CIL0992S0113	Isoform022497	CIL0992S0113	new	307	Sense LncRNAs
Gene010141	-	Isoform022498	-	novel	4698	Antisense LncRNAs
Gene010143	CIL0993S0015	Isoform022505	CIL0993S0015	new	1436	Sense LncRNAs
Gene010144	CIL0993S0025	Isoform022519	CIL0993S0025	new	2265	Intronic LncRNAs
Gene010144	CIL0993S0025	Isoform022520	CIL0993S0025	new	297	Intronic LncRNAs
Gene010152	CIL0993S0052	Isoform022549	CIL0993S0052	new	2619	Sense LncRNAs
Gene010156	CIL0993S0063	Isoform022558	CIL0993S0063	new	325	Sense LncRNAs
Gene010166	CIL0993S0010,CIL0993S0011	Isoform022577	CIL0993S0010	new	2976	Sense LncRNAs
Gene010166	CIL0993S0010,CIL0993S0011	Isoform022579	CIL0993S0010	new	2313	Sense LncRNAs
Gene010170	CIL0993S0042,CIL0993S0043,CIL0993S0044	Isoform022585	CIL0993S0043	new	4537	Sense LncRNAs
Gene010170	CIL0993S0042,CIL0993S0043,CIL0993S0044	Isoform022593	CIL0993S0043	new	2837	Intronic LncRNAs
Gene010171	-	Isoform022594	-	novel	1702	Antisense LncRNAs
Gene010186	-	Isoform022620	-	novel	267	Intronic LncRNAs
Gene010200	CIL0996S0105	Isoform022649	CIL0996S0105	new	1487	Sense LncRNAs
Gene010200	CIL0996S0105	Isoform022650	CIL0996S0105	new	673	Sense LncRNAs
Gene010200	CIL0996S0105	Isoform022651	CIL0996S0105	new	1348	Sense LncRNAs
Gene010205	CIL0996S0048	Isoform022696	CIL0996S0048	new	197	Intronic LncRNAs
Gene010228	CIL0998S0062	Isoform022777	CIL0998S0062	new	2511	Intronic LncRNAs
Gene010230	-	Isoform022780	-	novel	260	Intergenic LncRNAs
Gene010234	CIL0998S0077	Isoform022787	CIL0998S0077	new	1269	Sense LncRNAs
Gene010240	-	Isoform022798	-	novel	1508	Intergenic LncRNAs
Gene010240	-	Isoform022799	-	novel	585	Intergenic LncRNAs
Gene010241	-	Isoform022800	-	novel	1727	Antisense LncRNAs
Gene010245	-	Isoform022809	-	novel	1832	Intergenic LncRNAs
Gene010253	-	Isoform022825	-	novel	2421	Other
Gene010259	CIL0998S0099	Isoform022833	CIL0998S0099	new	604	Sense LncRNAs
Gene010270	-	Isoform022853	-	novel	886	Other
Gene010281	CIL1001S0102	Isoform022881	CIL1001S0102	new	1757	Sense LncRNAs
Gene010281	CIL1001S0102	Isoform022882	CIL1001S0102	new	620	Sense LncRNAs
Gene010284	-	Isoform022886	-	novel	503	Bidirectional LncRNAs
Gene010285	-	Isoform022887	-	novel	451	Intergenic LncRNAs
Gene010293	CIL1001S0064	Isoform022909	CIL1001S0064	new	916	Sense LncRNAs
Gene010302	CIL1001S0105	Isoform022920	CIL1001S0105	new	302	Sense LncRNAs
Gene010317	CIL1002S0076	Isoform022959	CIL1002S0076	new	190	Sense LncRNAs
Gene010317	CIL1002S0076	Isoform022961	CIL1002S0076	new	932	Intronic LncRNAs
Gene010317	CIL1002S0076	Isoform022962	CIL1002S0076	new	231	Sense LncRNAs
Gene010319	CIL1002S0108	Isoform022967	CIL1002S0108	new	212	Sense LncRNAs
Gene010325	-	Isoform022989	-	novel	479	Intergenic LncRNAs
Gene010326	-	Isoform022990	-	novel	532	Other
Gene010359	CIL1003S0031	Isoform023055	CIL1003S0031	new	746	Sense LncRNAs
Gene010359	CIL1003S0031	Isoform023057	CIL1003S0031	new	724	Sense LncRNAs
Gene010389	CIL1003S0137	Isoform023121	CIL1003S0137	new	1335	Sense LncRNAs
Gene010409	-	Isoform023165	-	novel	701	Intergenic LncRNAs
Gene010413	CIL1003S0080	Isoform023174	CIL1003S0080	new	2526	Intronic LncRNAs
Gene010418	-	Isoform023180	-	novel	2447	Intergenic LncRNAs
Gene010426	-	Isoform023198	-	novel	4633	Intronic LncRNAs
Gene010429	CIL1003S0136	Isoform023203	CIL1003S0136	new	3207	Sense LncRNAs
Gene010436	-	Isoform023212	-	novel	3424	Intronic LncRNAs
Gene010455	-	Isoform023258	-	novel	3054	Antisense LncRNAs
Gene010460	CIL1006S0016	Isoform023272	CIL1006S0016	new	4231	Sense LncRNAs
Gene010464	CIL1006S0026	Isoform023277	CIL1006S0026	new	1865	Sense LncRNAs
Gene010470	CIL1006S0076	Isoform023296	CIL1006S0076	new	228	Sense LncRNAs
Gene010480	CIL1006S0125	Isoform023328	CIL1006S0125	new	3356	Sense LncRNAs
Gene010485	-	Isoform023333	-	novel	500	Intronic LncRNAs
Gene010490	-	Isoform023344	-	novel	2953	Antisense LncRNAs
Gene010490	-	Isoform023345	-	novel	3559	Antisense LncRNAs
Gene010490	-	Isoform023346	-	novel	3725	Antisense LncRNAs
Gene010490	-	Isoform023347	-	novel	4670	Antisense LncRNAs
Gene010490	-	Isoform023348	-	novel	4776	Antisense LncRNAs
Gene010490	-	Isoform023349	-	novel	4015	Antisense LncRNAs
Gene010490	-	Isoform023350	-	novel	1880	Antisense LncRNAs
Gene010490	-	Isoform023351	-	novel	3177	Antisense LncRNAs
Gene010490	-	Isoform023352	-	novel	3444	Antisense LncRNAs
Gene010490	-	Isoform023353	-	novel	3581	Antisense LncRNAs
Gene010490	-	Isoform023354	-	novel	3034	Antisense LncRNAs
Gene010490	-	Isoform023355	-	novel	2769	Antisense LncRNAs
Gene010490	-	Isoform023356	-	novel	3548	Antisense LncRNAs
Gene010495	-	Isoform023363	-	novel	516	Intergenic LncRNAs
Gene010502	CIL1009S0069	Isoform023379	CIL1009S0069	new	208	Sense LncRNAs
Gene010513	-	Isoform023403	-	novel	3465	Intergenic LncRNAs
Gene010595	-	Isoform023561	-	novel	381	Antisense LncRNAs
Gene010609	-	Isoform023588	-	novel	460	Antisense LncRNAs
Gene010615	CIL1015S0125	Isoform023597	CIL1015S0125	new	1363	Sense LncRNAs
Gene010637	CIL1015S0109	Isoform023638	CIL1015S0109	new	241	Sense LncRNAs
Gene010640	CIL1015S0124	Isoform023642	CIL1015S0124	new	832	Sense LncRNAs
Gene010642	CIL1018S0003	Isoform023645	CIL1018S0003	new	548	Sense LncRNAs
Gene010662	CIL1018S0108	Isoform023714	CIL1018S0108	new	256	Sense LncRNAs
Gene010663	-	Isoform023715	-	novel	440	Intergenic LncRNAs
Gene010695	-	Isoform023812	-	novel	234	Other
Gene010702	CIL1020S0017,CIL1020S0019,CIL1020S0020,CIL1020S0021,CIL1020S0022,CIL1020S0025,CIL1020S0026,CIL1020S0027,CIL1020S0029,CIL1020S0030	Isoform023822	CIL1020S0017,CIL1020S0019,CIL1020S0020,CIL1020S0021,CIL1020S0022,CIL1020S0025,CIL1020S0026,CIL1020S0027,CIL1020S0029,CIL1020S0030	new	2163	Antisense LncRNAs,Sense LncRNAs
Gene010702	CIL1020S0017,CIL1020S0019,CIL1020S0020,CIL1020S0021,CIL1020S0022,CIL1020S0025,CIL1020S0026,CIL1020S0027,CIL1020S0029,CIL1020S0030	Isoform023824	-	novel	3327	Antisense LncRNAs
Gene010711	CIL1020S0063,CIL1020S0065,CIL1020S0067,CIL1020S0068,CIL1020S0070,CIL1020S0071,CIL1020S0072,CIL1020S0073,CIL1020S0074	Isoform023845	CIL1020S0073	new	1034	Sense LncRNAs
Gene010711	CIL1020S0063,CIL1020S0065,CIL1020S0067,CIL1020S0068,CIL1020S0070,CIL1020S0071,CIL1020S0072,CIL1020S0073,CIL1020S0074	Isoform023855	-	novel	3218	Intergenic LncRNAs
Gene010712	CIL1020S0079	Isoform023875	CIL1020S0079	new	288	Sense LncRNAs
Gene010738	CIL1020S0049,CIL1020S0051,CIL1020S0057,CIL1020S0064,CIL1020S0066	Isoform023929	-	novel	3227	Intergenic LncRNAs
Gene010756	CIL1021S0040,CIL1021S0041	Isoform023973	CIL1021S0040	new	318	Intronic LncRNAs
Gene010760	-	Isoform023979	-	novel	655	Intergenic LncRNAs
Gene010762	CIL1021S0069	Isoform023981	CIL1021S0069	new	546	Sense LncRNAs
Gene010769	CIL1021S0099	Isoform023997	CIL1021S0099	new	233	Sense LncRNAs
Gene010812	CIL1023S0069	Isoform024077	CIL1023S0069	new	260	Sense LncRNAs
Gene010814	CIL1023S0079	Isoform024082	CIL1023S0079	new	773	Antisense LncRNAs,Sense LncRNAs
Gene010822	CIL1023S0020	Isoform024094	CIL1023S0020	new	302	Sense LncRNAs
Gene010825	CIL1023S0031	Isoform024099	CIL1023S0031	new	2620	Sense LncRNAs
Gene010829	CIL1023S0049	Isoform024106	CIL1023S0049	new	313	Sense LncRNAs
Gene010832	CIL1023S0055	Isoform024110	CIL1023S0055	new	1901	Sense LncRNAs
Gene010848	CIL1025S0036	Isoform024141	-	novel	251	Other
Gene010854	CIL1025S0061	Isoform024166	CIL1025S0061	new	553	Sense LncRNAs
Gene010856	-	Isoform024172	-	novel	254	Intergenic LncRNAs
Gene010868	CIL1025S0117	Isoform024194	CIL1025S0117	new	1891	Sense LncRNAs
Gene010868	CIL1025S0117	Isoform024195	CIL1025S0117	new	1725	Sense LncRNAs
Gene010868	CIL1025S0117	Isoform024196	CIL1025S0117	new	993	Sense LncRNAs
Gene010870	CIL1025S0135	Isoform024201	CIL1025S0135	new	240	Sense LncRNAs
Gene010871	CIL1025S0136	Isoform024207	CIL1025S0136	new	453	Sense LncRNAs
Gene010878	CIL1025S0026	Isoform024225	-	novel	415	Intergenic LncRNAs
Gene010900	CIL1025S0126	Isoform024266	CIL1025S0126	new	318	Sense LncRNAs
Gene010905	CIL1025S0155	Isoform024281	CIL1025S0155	new	722	Sense LncRNAs
Gene010907	-	Isoform024283	-	novel	282	Bidirectional LncRNAs
Gene010910	-	Isoform024286	-	novel	463	Other
Gene010932	CIL1028S0045	Isoform024329	CIL1028S0045	new	1458	Sense LncRNAs
Gene010938	CIL1028S0068	Isoform024338	CIL1028S0068	new	2573	Sense LncRNAs
Gene010940	CIL1028S0085	Isoform024340	CIL1028S0085	new	2407	Sense LncRNAs
Gene010940	CIL1028S0085	Isoform024342	CIL1028S0085	new	6674	Sense LncRNAs
Gene010971	CIL1029S0037	Isoform024392	CIL1029S0037	new	2803	Sense LncRNAs
Gene010979	-	Isoform024409	-	novel	1674	Other
Gene010987	-	Isoform024422	-	novel	318	Bidirectional LncRNAs
Gene011012	CIL1030S0142	Isoform024474	-	novel	211	Other
Gene011014	CIL1030S0151	Isoform024476	-	novel	258	Intergenic LncRNAs
Gene011024	CIL1030S0035	Isoform024505	CIL1030S0035	new	166	Sense LncRNAs
Gene011044	CIL1030S0146	Isoform024537	CIL1030S0146	new	252	Sense LncRNAs
Gene011044	CIL1030S0146	Isoform024539	CIL1030S0146	new	433	Sense LncRNAs
Gene011048	CIL1031S0001	Isoform024550	CIL1031S0001	new	244	Sense LncRNAs
Gene011073	-	Isoform024618	-	novel	760	Bidirectional LncRNAs
Gene011087	CIL1031S0016	Isoform024637	CIL1031S0016	new	248	Sense LncRNAs
Gene011091	CIL1031S0029	Isoform024644	CIL1031S0029	new	154	Sense LncRNAs
Gene011096	CIL1031S0061	Isoform024654	CIL1031S0061	new	375	Sense LncRNAs
Gene011106	-	Isoform024677	-	novel	554	Antisense LncRNAs
Gene011107	-	Isoform024678	-	novel	460	Antisense LncRNAs
Gene011110	CIL1031S0109	Isoform024682	CIL1031S0109	new	795	Sense LncRNAs
Gene011110	CIL1031S0109	Isoform024683	CIL1031S0109	new	331	Sense LncRNAs
Gene011114	-	Isoform024690	-	novel	2562	Intergenic LncRNAs
Gene011122	CIL1031S0129	Isoform024710	CIL1031S0129	new	323	Sense LncRNAs
Gene011125	-	Isoform024714	-	novel	316	Bidirectional LncRNAs
Gene011144	CIL1032S0035	Isoform024756	CIL1032S0035	new	313	Sense LncRNAs
Gene011161	CIL1032S0105	Isoform024800	CIL1032S0105	new	427	Sense LncRNAs
Gene011164	-	Isoform024803	-	novel	576	Other
Gene011195	CIL1032S0095,CIL1032S0097	Isoform024867	CIL1032S0095	new	317	Sense LncRNAs
Gene011208	CIL1032S0132	Isoform024897	CIL1032S0132	new	331	Sense LncRNAs
Gene011211	-	Isoform024906	-	novel	1998	Antisense LncRNAs
Gene011213	-	Isoform024908	-	novel	485	Intergenic LncRNAs
Gene011215	-	Isoform024910	-	novel	2692	Intergenic LncRNAs
Gene011230	CIL1034S0065	Isoform024938	CIL1034S0065	new	317	Sense LncRNAs
Gene011246	CIL1034S0030	Isoform024977	CIL1034S0030	new	482	Sense LncRNAs
Gene011246	CIL1034S0030	Isoform024979	CIL1034S0030	new	434	Sense LncRNAs
Gene011263	-	Isoform025012	-	novel	3270	Antisense LncRNAs
Gene011264	-	Isoform025013	-	novel	754	Intergenic LncRNAs
Gene011265	CIL0090S0011	Isoform025014	CIL0090S0011	new	315	Sense LncRNAs
Gene011271	-	Isoform025025	-	novel	1300	Intergenic LncRNAs
Gene011291	CIL1037S0074,CIL1037S0078,CIL1037S0081,CIL1037S0084	Isoform025075	CIL1037S0084	new	399	Sense LncRNAs
Gene011305	-	Isoform025111	-	novel	1917	Intergenic LncRNAs
Gene011313	CIL1037S0057	Isoform025130	CIL1037S0057	new	377	Sense LncRNAs
Gene011317	CIL1037S0073	Isoform025161	CIL1037S0073	new	634	Sense LncRNAs
Gene011337	CIL1038S0032	Isoform025202	CIL1038S0032	new	3500	Sense LncRNAs
Gene011343	CIL1038S0045	Isoform025215	CIL1038S0045	new	579	Sense LncRNAs
Gene011355	-	Isoform025232	-	novel	543	Antisense LncRNAs
Gene011359	CIL1038S0124	Isoform025244	CIL1038S0124	new	3601	Sense LncRNAs
Gene011368	CIL1038S0028	Isoform025258	CIL1038S0028	new	4226	Sense LncRNAs
Gene011368	CIL1038S0028	Isoform025259	CIL1038S0028	new	325	Sense LncRNAs
Gene011375	-	Isoform025268	-	novel	3285	Other
Gene011377	CIL1038S0057	Isoform025272	-	novel	188	Other
Gene011399	CIL1040S0047	Isoform025316	CIL1040S0047	new	1786	Sense LncRNAs
Gene011399	CIL1040S0047	Isoform025317	CIL1040S0047	new	1934	Sense LncRNAs
Gene011405	-	Isoform025331	-	novel	2864	Intergenic LncRNAs
Gene011419	CIL1040S0034	Isoform025360	CIL1040S0034	new	1185	Sense LncRNAs
Gene011426	CIL1040S0065	Isoform025369	CIL1040S0065	new	301	Sense LncRNAs
Gene011441	-	Isoform025393	-	novel	609	Intergenic LncRNAs
Gene011441	-	Isoform025394	-	novel	582	Intergenic LncRNAs
Gene011443	-	Isoform025396	-	novel	892	Intergenic LncRNAs
Gene011483	CIL1047S0099	Isoform025490	CIL1047S0099	new	401	Intronic LncRNAs
Gene011520	-	Isoform025606	-	novel	362	Antisense LncRNAs
Gene011532	-	Isoform025631	-	novel	705	Intergenic LncRNAs
Gene011541	CIL1048S0003	Isoform025651	CIL1048S0003	new	1202	Sense LncRNAs
Gene011541	CIL1048S0003	Isoform025652	CIL1048S0003	new	1306	Sense LncRNAs
Gene011545	CIL1048S0014	Isoform025658	CIL1048S0014	new	371	Sense LncRNAs
Gene011551	CIL1048S0031	Isoform025669	CIL1048S0031	new	305	Sense LncRNAs
Gene011553	CIL1048S0068	Isoform025672	CIL1048S0068	new	1744	Sense LncRNAs
Gene011568	CIL1048S0054	Isoform025717	CIL1048S0054	new	2604	Sense LncRNAs
Gene011575	CIL1048S0075,CIL1048S0077,CIL1048S0080,CIL1048S0083	Isoform025740	-	novel	1135	Antisense LncRNAs
Gene011592	CIL1050S0011	Isoform025773	CIL1050S0011	new	2954	Sense LncRNAs
Gene011592	CIL1050S0011	Isoform025774	CIL1050S0011	new	528	Sense LncRNAs
Gene011592	CIL1050S0011	Isoform025775	CIL1050S0011	new	798	Sense LncRNAs
Gene011621	-	Isoform025851	-	novel	550	Intergenic LncRNAs
Gene011625	-	Isoform025856	-	novel	517	Intergenic LncRNAs
Gene011633	CIL1053S0027	Isoform025871	CIL1053S0027	new	515	Sense LncRNAs
Gene011637	CIL1053S0015	Isoform025877	CIL1053S0015	new	550	Sense LncRNAs
Gene011641	-	Isoform025884	-	novel	742	Bidirectional LncRNAs
Gene011644	CIL1053S0043	Isoform025892	CIL1053S0043	new	437	Sense LncRNAs
Gene011648	-	Isoform025900	-	novel	2342	Intergenic LncRNAs
Gene011650	-	Isoform025902	-	novel	1353	Other
Gene011685	-	Isoform025971	-	novel	407	Intergenic LncRNAs
Gene011716	CIL1056S0024	Isoform026027	CIL1056S0024	new	3582	Sense LncRNAs
Gene011717	CIL1056S0029	Isoform026029	CIL1056S0029	new	825	Sense LncRNAs
Gene011718	-	Isoform026030	-	novel	6137	Antisense LncRNAs
Gene011727	CIL1056S0030	Isoform026051	CIL1056S0030	new	6167	Sense LncRNAs
Gene011728	CIL1056S0033	Isoform026065	CIL1056S0033	new	490	Sense LncRNAs
Gene011729	-	Isoform026074	-	novel	571	Antisense LncRNAs
Gene011739	CIL1057S0026	Isoform026091	CIL1057S0026	new	295	Sense LncRNAs
Gene011787	-	Isoform026237	-	novel	246	Intronic LncRNAs
Gene011790	CIL1060S0045	Isoform026240	CIL1060S0045	new	305	Intronic LncRNAs
Gene011796	CIL1060S0057	Isoform026250	CIL1060S0057	new	203	Intronic LncRNAs
Gene011800	CIL1060S0074,CIL1060S0076,CIL1060S0078,CIL1060S0079	Isoform026265	CIL1060S0078	new	2391	Sense LncRNAs
Gene011802	CIL1060S0084	Isoform026275	CIL1060S0084	new	301	Intronic LncRNAs
Gene011810	CIL1060S0108	Isoform026291	CIL1060S0108	new	3933	Sense LncRNAs
Gene011825	CIL1060S0047	Isoform026327	CIL1060S0047	new	1914	Sense LncRNAs
Gene011827	CIL1060S0065	Isoform026329	CIL1060S0065	new	241	Sense LncRNAs
Gene011846	CIL1061S0031	Isoform026363	CIL1061S0031	new	1718	Sense LncRNAs
Gene011861	CIL1061S0061	Isoform026390	CIL1061S0061	new	447	Sense LncRNAs
Gene011876	CIL1061S0104	Isoform026434	CIL1061S0104	new	538	Sense LncRNAs
Gene011877	CIL1061S0105	Isoform026439	CIL1061S0105	new	299	Sense LncRNAs
Gene011884	CIL1061S0131	Isoform026456	CIL1061S0131	new	226	Sense LncRNAs
Gene011888	CIL1061S0014	Isoform026464	CIL1061S0014	new	5713	Antisense LncRNAs,Sense LncRNAs
Gene011904	-	Isoform026497	-	novel	4204	Intronic LncRNAs
Gene011911	CIL1061S0124	Isoform026504	CIL1061S0124	new	285	Sense LncRNAs
Gene011917	CIL1063S0017,CIL1063S0018	Isoform026514	-	novel	255	Other
Gene011930	CIL1063S0019,CIL1063S0020	Isoform026535	CIL1063S0019,CIL1063S0020	new	5063	Antisense LncRNAs,Sense LncRNAs
Gene011962	-	Isoform026576	-	novel	770	Intergenic LncRNAs
Gene011970	-	Isoform026588	-	novel	548	Intergenic LncRNAs
Gene012035	-	Isoform026719	-	novel	402	Antisense LncRNAs
Gene012054	CIL1066S0056	Isoform026758	CIL1066S0056	new	528	Sense LncRNAs
Gene012061	CIL1066S0105	Isoform026789	CIL1066S0105	new	449	Sense LncRNAs
Gene012066	CIL0094S0013	Isoform026800	CIL0094S0013	new	682	Sense LncRNAs
Gene012074	CIL0094S0002	Isoform026820	CIL0094S0002	new	437	Sense LncRNAs
Gene012098	-	Isoform026869	-	novel	395	Intergenic LncRNAs
Gene012102	CIL1068S0085	Isoform026877	CIL1068S0085	new	2629	Antisense LncRNAs,Sense LncRNAs
Gene012102	CIL1068S0085	Isoform026878	CIL1068S0085	new	3621	Sense LncRNAs
Gene012112	CIL1068S0006	Isoform026899	CIL1068S0006	new	629	Sense LncRNAs
Gene012120	-	Isoform026923	-	novel	536	Intergenic LncRNAs
Gene012132	CIL1071S0004	Isoform026949	CIL1071S0004	new	5599	Sense LncRNAs
Gene012149	CIL1071S0007	Isoform026981	CIL1071S0007	new	515	Sense LncRNAs
Gene012156	CIL1071S0027	Isoform026990	CIL1071S0027	new	218	Intronic LncRNAs
Gene012169	CIL1071S0089	Isoform027019	CIL1071S0089	new	835	Sense LncRNAs
Gene012178	-	Isoform027044	-	novel	521	Antisense LncRNAs
Gene012182	-	Isoform027050	-	novel	433	Intergenic LncRNAs
Gene012183	-	Isoform027051	-	novel	2752	Antisense LncRNAs
Gene012185	CIL1075S0041,CIL1075S0042	Isoform027055	CIL1075S0041	new	1513	Sense LncRNAs
Gene012185	CIL1075S0041,CIL1075S0042	Isoform027056	CIL1075S0041	new	1306	Sense LncRNAs
Gene012187	CIL1075S0046	Isoform027067	CIL1075S0046	new	396	Sense LncRNAs
Gene012191	CIL1075S0076	Isoform027072	CIL1075S0076	new	391	Sense LncRNAs
Gene012200	CIL1075S0025	Isoform027093	CIL1075S0025	new	233	Intronic LncRNAs
Gene012209	-	Isoform027107	-	novel	557	Intergenic LncRNAs
Gene012222	CIL1076S0008	Isoform027133	CIL1076S0008	new	359	Sense LncRNAs
Gene012223	-	Isoform027134	-	novel	5686	Intergenic LncRNAs
Gene012223	-	Isoform027135	-	novel	5459	Intergenic LncRNAs
Gene012226	-	Isoform027141	-	novel	293	Antisense LncRNAs
Gene012236	CIL1076S0052	Isoform027155	CIL1076S0052	new	561	Intronic LncRNAs
Gene012242	CIL1076S0069	Isoform027166	CIL1076S0069	new	253	Sense LncRNAs
Gene012243	CIL1076S0070,CIL1076S0072,CIL1076S0076,CIL1076S0077,CIL1076S0079,CIL1076S0081,CIL1076S0082	Isoform027169	CIL1076S0076	new	3130	Sense LncRNAs
Gene012243	CIL1076S0070,CIL1076S0072,CIL1076S0076,CIL1076S0077,CIL1076S0079,CIL1076S0081,CIL1076S0082	Isoform027171	CIL1076S0076	new	3096	Sense LncRNAs
Gene012243	CIL1076S0070,CIL1076S0072,CIL1076S0076,CIL1076S0077,CIL1076S0079,CIL1076S0081,CIL1076S0082	Isoform027181	CIL1076S0072	new	566	Sense LncRNAs
Gene012244	CIL1076S0097	Isoform027191	CIL1076S0097	new	362	Sense LncRNAs
Gene012253	-	Isoform027204	-	novel	5694	Intergenic LncRNAs
Gene012253	-	Isoform027205	-	novel	5579	Intergenic LncRNAs
Gene012253	-	Isoform027206	-	novel	5205	Intergenic LncRNAs
Gene012254	-	Isoform027207	-	novel	2878	Antisense LncRNAs
Gene012254	-	Isoform027208	-	novel	1968	Antisense LncRNAs
Gene012254	-	Isoform027209	-	novel	245	Intronic LncRNAs
Gene012254	-	Isoform027210	-	novel	1428	Intronic LncRNAs
Gene012255	-	Isoform027211	-	novel	1495	Intergenic LncRNAs
Gene012275	-	Isoform027239	-	novel	579	Intergenic LncRNAs
Gene012283	CIL1077S0018	Isoform027252	CIL1077S0018	new	507	Sense LncRNAs
Gene012296	CIL1078S0035	Isoform027275	-	novel	284	Other
Gene012309	CIL1078S0078	Isoform027298	CIL1078S0078	new	432	Sense LncRNAs
Gene012310	CIL1078S0081	Isoform027300	CIL1078S0081	new	1430	Sense LncRNAs
Gene012310	CIL1078S0081	Isoform027301	CIL1078S0081	new	1456	Sense LncRNAs
Gene012310	CIL1078S0081	Isoform027302	CIL1078S0081	new	3324	Sense LncRNAs
Gene012314	CIL1078S0095	Isoform027316	CIL1078S0095	new	518	Sense LncRNAs
Gene012325	CIL1078S0025,CIL1078S0028,CIL1078S0029,CIL1078S0030,CIL1078S0031,CIL1078S0032,CIL1078S0033,CIL1078S0036,CIL1078S0038	Isoform027333	CIL1078S0033	new	2119	Sense LncRNAs
Gene012325	CIL1078S0025,CIL1078S0028,CIL1078S0029,CIL1078S0030,CIL1078S0031,CIL1078S0032,CIL1078S0033,CIL1078S0036,CIL1078S0038	Isoform027346	CIL1078S0033	new	2621	Sense LncRNAs
Gene012335	CIL1078S0068	Isoform027363	CIL1078S0068	new	323	Sense LncRNAs
Gene012337	-	Isoform027366	-	novel	592	Intergenic LncRNAs
Gene012338	CIL1078S0074	Isoform027369	CIL1078S0074	new	324	Sense LncRNAs
Gene012345	CIL1078S0088	Isoform027392	CIL1078S0088	new	407	Sense LncRNAs
Gene012354	-	Isoform027409	-	novel	382	Intergenic LncRNAs
Gene012356	CIL1081S0017	Isoform027412	CIL1081S0017	new	419	Sense LncRNAs
Gene012359	CIL1081S0025	Isoform027417	-	novel	396	Other
Gene012361	-	Isoform027419	-	novel	2196	Intergenic LncRNAs
Gene012381	CIL1081S0050	Isoform027451	CIL1081S0050	new	191	Intronic LncRNAs
Gene012385	CIL1081S0073	Isoform027457	CIL1081S0073	new	432	Intronic LncRNAs
Gene012392	CIL1082S0003	Isoform027471	CIL1082S0003	new	575	Sense LncRNAs
Gene012403	CIL1082S0043	Isoform027494	CIL1082S0043	new	421	Sense LncRNAs
Gene012405	CIL1082S0053	Isoform027497	CIL1082S0053	new	420	Sense LncRNAs
Gene012448	CIL1082S0095	Isoform027589	CIL1082S0095	new	1198	Sense LncRNAs
Gene012466	CIL1083S0002	Isoform027632	CIL1083S0002	new	898	Sense LncRNAs
Gene012467	-	Isoform027633	-	novel	612	Intergenic LncRNAs
Gene012477	CIL1084S0033	Isoform027664	-	novel	650	Intergenic LncRNAs
Gene012506	CIL1084S0082	Isoform027724	CIL1084S0082	new	287	Sense LncRNAs
Gene012526	-	Isoform027768	-	novel	324	Bidirectional LncRNAs
Gene012527	CIL1086S0075	Isoform027769	CIL1086S0075	new	1770	Sense LncRNAs
Gene012527	CIL1086S0075	Isoform027770	CIL1086S0075	new	2919	Sense LncRNAs
Gene012527	CIL1086S0075	Isoform027771	CIL1086S0075	new	1699	Sense LncRNAs
Gene012528	-	Isoform027772	-	novel	294	Bidirectional LncRNAs
Gene012529	-	Isoform027773	-	novel	736	Antisense LncRNAs
Gene012547	CIL1086S0097	Isoform027807	CIL1086S0097	new	2123	Sense LncRNAs
Gene012548	CIL1086S0100	Isoform027808	CIL1086S0100	new	943	Sense LncRNAs
Gene012553	CIL1087S0023	Isoform027815	CIL1087S0023	new	186	Sense LncRNAs
Gene012555	CIL1087S0026	Isoform027823	CIL1087S0026	new	453	Sense LncRNAs
Gene012571	CIL1087S0012	Isoform027858	CIL1087S0012	new	677	Sense LncRNAs
Gene012583	CIL1087S0060	Isoform027886	CIL1087S0060	new	2307	Sense LncRNAs
Gene012583	CIL1087S0060	Isoform027887	CIL1087S0060	new	2659	Sense LncRNAs
Gene012589	CIL1089S0003	Isoform027894	CIL1089S0003	new	2743	Sense LncRNAs
Gene012590	CIL1089S0011	Isoform027896	CIL1089S0011	new	2793	Sense LncRNAs
Gene012603	CIL1089S0016	Isoform027912	CIL1089S0016	new	757	Sense LncRNAs
Gene012604	CIL1089S0036	Isoform027918	CIL1089S0036	new	433	Sense LncRNAs
Gene012605	CIL1089S0039	Isoform027921	CIL1089S0039	new	312	Sense LncRNAs
Gene012606	-	Isoform027923	-	novel	842	Intergenic LncRNAs
Gene012607	-	Isoform027924	-	novel	2586	Intergenic LncRNAs
Gene012613	-	Isoform027933	-	novel	691	Antisense LncRNAs
Gene012624	CIL1090S0038	Isoform027961	CIL1090S0038	new	288	Sense LncRNAs
Gene012625	CIL1090S0041	Isoform027967	CIL1090S0041	new	367	Sense LncRNAs
Gene012633	CIL1090S0075	Isoform027994	CIL1090S0075	new	2268	Sense LncRNAs
Gene012644	CIL1090S0021	Isoform028032	CIL1090S0021	new	2783	Sense LncRNAs
Gene012646	CIL1090S0029,CIL1090S0030	Isoform028040	CIL1090S0030	new	2408	Sense LncRNAs
Gene012668	CIL1092S0001	Isoform028074	CIL1092S0001	new	1145	Sense LncRNAs
Gene012670	CIL1092S0006	Isoform028079	CIL1092S0006	new	409	Sense LncRNAs
Gene012686	CIL1092S0090	Isoform028122	CIL1092S0090	new	2307	Sense LncRNAs
Gene012692	-	Isoform028133	-	novel	1897	Intergenic LncRNAs
Gene012694	CIL1092S0007,CIL1092S0010,CIL1092S0012,CIL1092S0019,CIL1092S0041,CIL1092S0042,CIL1092S0043,CIL1092S0045,CIL1092S0047,CIL1092S0050,CIL1092S0051,CIL1092S0053,CIL1092S0054,CIL1092S0056,CIL1092S0057,CIL1092S0058,CIL1092S0060,CIL1092S0061,CIL1092S0063,CIL1092S0065,CIL1092S0068,CIL1092S0072,CIL1092S0073,CIL1092S0074,CIL1092S0078,CIL1092S0079,CIL1092S0081,CIL1092S0084,CIL1092S0085,CIL1092S0088,CIL1092S0…	Isoform028160	-	novel	315	Antisense LncRNAs
Gene012694	CIL1092S0007,CIL1092S0010,CIL1092S0012,CIL1092S0019,CIL1092S0041,CIL1092S0042,CIL1092S0043,CIL1092S0045,CIL1092S0047,CIL1092S0050,CIL1092S0051,CIL1092S0053,CIL1092S0054,CIL1092S0056,CIL1092S0057,CIL1092S0058,CIL1092S0060,CIL1092S0061,CIL1092S0063,CIL1092S0065,CIL1092S0068,CIL1092S0072,CIL1092S0073,CIL1092S0074,CIL1092S0078,CIL1092S0079,CIL1092S0081,CIL1092S0084,CIL1092S0085,CIL1092S0088,CIL1092S0…	Isoform028175	CIL1092S0093	new	329	Sense LncRNAs
Gene012694	CIL1092S0007,CIL1092S0010,CIL1092S0012,CIL1092S0019,CIL1092S0041,CIL1092S0042,CIL1092S0043,CIL1092S0045,CIL1092S0047,CIL1092S0050,CIL1092S0051,CIL1092S0053,CIL1092S0054,CIL1092S0056,CIL1092S0057,CIL1092S0058,CIL1092S0060,CIL1092S0061,CIL1092S0063,CIL1092S0065,CIL1092S0068,CIL1092S0072,CIL1092S0073,CIL1092S0074,CIL1092S0078,CIL1092S0079,CIL1092S0081,CIL1092S0084,CIL1092S0085,CIL1092S0088,CIL1092S0…	Isoform028179	-	novel	537	Intergenic LncRNAs
Gene012697	CIL1092S0116	Isoform028192	-	novel	445	Intergenic LncRNAs
Gene012708	CIL1093S0043	Isoform028213	CIL1093S0043	new	372	Sense LncRNAs
Gene012719	-	Isoform028230	-	novel	1690	Other
Gene012738	-	Isoform028261	-	novel	660	Bidirectional LncRNAs
Gene012758	-	Isoform028306	-	novel	412	Intergenic LncRNAs
Gene012767	CIL1094S0056	Isoform028326	CIL1094S0056	new	789	Sense LncRNAs
Gene012767	CIL1094S0056	Isoform028327	CIL1094S0056	new	1352	Sense LncRNAs
Gene012767	CIL1094S0056	Isoform028328	CIL1094S0056	new	2945	Sense LncRNAs
Gene012779	-	Isoform028352	-	novel	841	Bidirectional LncRNAs
Gene012780	-	Isoform028353	-	novel	3609	Intergenic LncRNAs
Gene012807	CIL1095S0033	Isoform028415	CIL1095S0033	new	368	Sense LncRNAs
Gene012815	-	Isoform028429	-	novel	3107	Intergenic LncRNAs
Gene012822	CIL1096S0044	Isoform028452	CIL1096S0044	new	802	Sense LncRNAs
Gene012822	CIL1096S0044	Isoform028453	CIL1096S0044	new	1261	Sense LncRNAs
Gene012822	CIL1096S0044	Isoform028454	CIL1096S0044	new	2602	Sense LncRNAs
Gene012822	CIL1096S0044	Isoform028464	CIL1096S0044	new	996	Sense LncRNAs
Gene012830	-	Isoform028482	-	novel	981	Intergenic LncRNAs
Gene012831	CIL1096S0009	Isoform028484	CIL1096S0009	new	466	Sense LncRNAs
Gene012837	CIL1096S0026	Isoform028495	CIL1096S0026	new	294	Sense LncRNAs
Gene012839	-	Isoform028502	-	novel	3515	Antisense LncRNAs
Gene012839	-	Isoform028503	-	novel	3325	Antisense LncRNAs
Gene012844	CIL1096S0050,CIL1096S0051,CIL1096S0052,CIL1096S0053,CIL1096S0056,CIL1096S0058,CIL1096S0059,CIL1096S0060,CIL1096S0061	Isoform028529	CIL1096S0050,CIL1096S0051,CIL1096S0052,CIL1096S0053,CIL1096S0056,CIL1096S0058,CIL1096S0059,CIL1096S0060,CIL1096S0061	new	4577	Sense LncRNAs
Gene012859	CIL1098S0033	Isoform028565	CIL1098S0033	new	3167	Sense LncRNAs
Gene012865	CIL1098S0044	Isoform028576	CIL1098S0044	new	262	Sense LncRNAs
Gene012867	-	Isoform028580	-	novel	1160	Antisense LncRNAs
Gene012880	CIL1099S0039,CIL1099S0040,CIL1099S0042	Isoform028607	CIL1099S0039,CIL1099S0040,CIL1099S0042	new	331	Antisense LncRNAs,Sense LncRNAs
Gene012880	CIL1099S0039,CIL1099S0040,CIL1099S0042	Isoform028611	CIL1099S0042	new	349	Sense LncRNAs
Gene012881	CIL1099S0044	Isoform028613	CIL1099S0044	new	278	Sense LncRNAs
Gene012894	CIL1099S0085	Isoform028637	CIL1099S0085	new	615	Sense LncRNAs
Gene012899	CIL1099S0096	Isoform028652	CIL1099S0096	new	221	Sense LncRNAs
Gene012902	-	Isoform028658	-	novel	4180	Intergenic LncRNAs
Gene012902	-	Isoform028659	-	novel	680	Intergenic LncRNAs
Gene012902	-	Isoform028660	-	novel	737	Intergenic LncRNAs
Gene012902	-	Isoform028661	-	novel	4039	Intergenic LncRNAs
Gene012910	CIL1099S0046	Isoform028674	CIL1099S0046	new	177	Sense LncRNAs
Gene012918	CIL1099S0067	Isoform028689	CIL1099S0067	new	248	Sense LncRNAs
Gene012928	CIL1100S0048	Isoform028709	CIL1100S0048	new	1456	Antisense LncRNAs,Sense LncRNAs
Gene012933	CIL1100S0080	Isoform028717	CIL1100S0080	new	302	Sense LncRNAs
Gene012946	CIL1100S0016	Isoform028737	CIL1100S0016	new	2413	Sense LncRNAs
Gene012951	CIL1100S0036	Isoform028745	-	novel	216	Other
Gene012953	CIL1100S0042	Isoform028749	CIL1100S0042	new	338	Sense LncRNAs
Gene012957	CIL1100S0061	Isoform028756	CIL1100S0061	new	329	Sense LncRNAs
Gene012962	CIL1100S0094	Isoform028769	CIL1100S0094	new	837	Sense LncRNAs
Gene012964	CIL1100S0101,CIL1100S0102,CIL1100S0106,CIL1100S0108,CIL1100S0110,CIL1100S0112,CIL1100S0113	Isoform028779	-	novel	307	Intergenic LncRNAs
Gene012973	CIL1101S0046	Isoform028801	CIL1101S0046	new	1516	Sense LncRNAs
Gene012990	CIL1101S0028	Isoform028828	CIL1101S0028	new	375	Sense LncRNAs
Gene013000	CIL1101S0063	Isoform028849	CIL1101S0063	new	996	Sense LncRNAs
Gene013005	CIL1101S0081	Isoform028865	CIL1101S0081	new	343	Sense LncRNAs
Gene013010	CIL1101S0105	Isoform028871	CIL1101S0105	new	503	Sense LncRNAs
Gene013015	CIL1102S0017,CIL1102S0019,CIL1102S0023,CIL1102S0024	Isoform028910	-	novel	300	Bidirectional LncRNAs
Gene013033	-	Isoform028961	-	novel	717	Intergenic LncRNAs
Gene013035	CIL1102S0029	Isoform028971	CIL1102S0029	new	254	Sense LncRNAs
Gene013054	-	Isoform029024	-	novel	6357	Intergenic LncRNAs
Gene013056	-	Isoform029027	-	novel	742	Other
Gene013056	-	Isoform029028	-	novel	589	Other
Gene013056	-	Isoform029030	-	novel	810	Other
Gene013056	-	Isoform029031	-	novel	606	Other
Gene013056	-	Isoform029032	-	novel	1407	Other
Gene013056	-	Isoform029033	-	novel	1003	Other
Gene013056	-	Isoform029035	-	novel	831	Other
Gene013056	-	Isoform029037	-	novel	677	Other
Gene013056	-	Isoform029038	-	novel	591	Other
Gene013058	CIL1104S0008	Isoform029042	CIL1104S0008	new	5083	Sense LncRNAs
Gene013059	CIL1104S0010,CIL1104S0011	Isoform029045	CIL1104S0011	new	202	Sense LncRNAs
Gene013066	-	Isoform029059	-	novel	682	Antisense LncRNAs
Gene013068	-	Isoform029062	-	novel	1965	Intergenic LncRNAs
Gene013069	-	Isoform029065	-	novel	3567	Other
Gene013069	-	Isoform029066	-	novel	551	Other
Gene013074	CIL1105S0015	Isoform029080	CIL1105S0015	new	3767	Sense LncRNAs
Gene013074	CIL1105S0015	Isoform029081	CIL1105S0015	new	3291	Sense LncRNAs
Gene013074	CIL1105S0015	Isoform029082	CIL1105S0015	new	3475	Sense LncRNAs
Gene013075	-	Isoform029083	-	novel	5023	Intergenic LncRNAs
Gene013076	-	Isoform029084	-	novel	2452	Intergenic LncRNAs
Gene013080	CIL1105S0030	Isoform029103	CIL1105S0030	new	418	Sense LncRNAs
Gene013091	CIL0098S0002	Isoform029124	CIL0098S0002	new	316	Sense LncRNAs
Gene013091	CIL0098S0002	Isoform029126	CIL0098S0002	new	4325	Sense LncRNAs
Gene013093	-	Isoform029128	-	novel	194	Bidirectional LncRNAs
Gene013098	CIL1106S0003	Isoform029154	CIL1106S0003	new	288	Sense LncRNAs
Gene013099	CIL1106S0004	Isoform029160	CIL1106S0004	new	398	Sense LncRNAs
Gene013144	CIL1107S0054	Isoform029247	CIL1107S0054	new	3277	Sense LncRNAs
Gene013145	CIL1107S0058	Isoform029249	CIL1107S0058	new	2295	Sense LncRNAs
Gene013157	-	Isoform029281	-	novel	392	Intergenic LncRNAs
Gene013162	-	Isoform029286	-	novel	637	Intergenic LncRNAs
Gene013172	CIL1107S0045	Isoform029302	CIL1107S0045	new	1650	Sense LncRNAs
Gene013175	CIL1107S0056	Isoform029312	CIL1107S0056	new	245	Sense LncRNAs
Gene013178	CIL1107S0072	Isoform029318	CIL1107S0072	new	300	Sense LncRNAs
Gene013189	CIL1110S0037|CIL1110S0036	Isoform029346	CIL1110S0036	new	404	Sense LncRNAs
Gene013197	CIL1110S0066	Isoform029370	CIL1110S0066	new	211	Intronic LncRNAs
Gene013200	-	Isoform029373	-	novel	395	Intergenic LncRNAs
Gene013245	CIL1112S0025	Isoform029483	CIL1112S0025	new	225	Sense LncRNAs
Gene013266	-	Isoform029527	-	novel	1176	Intergenic LncRNAs
Gene013268	CIL1113S0011	Isoform029530	CIL1113S0011	new	532	Intronic LncRNAs
Gene013268	CIL1113S0011	Isoform029532	CIL1113S0011	new	3232	Intronic LncRNAs
Gene013277	CIL1113S0051	Isoform029560	CIL1113S0051	new	262	Sense LncRNAs
Gene013279	CIL1113S0058	Isoform029564	CIL1113S0058	new	248	Sense LncRNAs
Gene013284	CIL1113S0002	Isoform029579	CIL1113S0002	new	556	Sense LncRNAs
Gene013288	CIL1113S0029	Isoform029595	CIL1113S0029	new	369	Sense LncRNAs
Gene013290	CIL1113S0036	Isoform029599	CIL1113S0036	new	1266	Sense LncRNAs
Gene013293	-	Isoform029606	-	novel	217	Intergenic LncRNAs
Gene013311	CIL1114S0071	Isoform029632	CIL1114S0071	new	1244	Intronic LncRNAs
Gene013312	-	Isoform029644	-	novel	460	Intergenic LncRNAs
Gene013316	-	Isoform029657	-	novel	571	Intergenic LncRNAs
Gene013320	CIL1114S0031	Isoform029662	CIL1114S0031	new	262	Sense LncRNAs
Gene013327	CIL1114S0069	Isoform029671	CIL1114S0069	new	278	Sense LncRNAs
Gene013332	CIL1118S0030	Isoform029691	CIL1118S0030	new	1872	Sense LncRNAs
Gene013333	CIL1118S0031	Isoform029694	CIL1118S0031	new	224	Sense LncRNAs
Gene013345	CIL1118S0075	Isoform029711	CIL1118S0075	new	257	Sense LncRNAs
Gene013353	CIL1118S0009	Isoform029725	CIL1118S0009	new	2515	Sense LncRNAs
Gene013357	CIL1118S0048	Isoform029741	CIL1118S0048	new	5118	Sense LncRNAs
Gene013364	-	Isoform029756	-	novel	648	Bidirectional LncRNAs
Gene013367	CIL1119S0019,CIL1119S0020	Isoform029770	CIL1119S0020	new	192	Sense LncRNAs
Gene013373	-	Isoform029781	-	novel	232	Bidirectional LncRNAs
Gene013378	CIL1119S0064	Isoform029809	CIL1119S0064	new	381	Sense LncRNAs
Gene013395	CIL1119S0046	Isoform029843	CIL1119S0046	new	2140	Sense LncRNAs
Gene013395	CIL1119S0046	Isoform029844	CIL1119S0046	new	2320	Sense LncRNAs
Gene013410	-	Isoform029885	-	novel	787	Intergenic LncRNAs
Gene013415	CIL1120S0018	Isoform029894	CIL1120S0018	new	339	Sense LncRNAs
Gene013422	CIL1122S0005	Isoform029915	-	novel	514	Intergenic LncRNAs
Gene013426	CIL1122S0021	Isoform029930	CIL1122S0021	new	336	Sense LncRNAs
Gene013448	CIL1122S0092	Isoform029983	CIL1122S0092	new	2907	Sense LncRNAs
Gene013458	CIL1122S0027	Isoform030002	CIL1122S0027	new	272	Sense LncRNAs
Gene013474	-	Isoform030039	-	novel	655	Intergenic LncRNAs
Gene013482	CIL1126S0010	Isoform030056	CIL1126S0010	new	452	Intronic LncRNAs
Gene013485	CIL1126S0018	Isoform030071	CIL1126S0018	new	275	Sense LncRNAs
Gene013496	CIL1126S0091	Isoform030117	CIL1126S0091	new	217	Sense LncRNAs
Gene013520	CIL1126S0097	Isoform030162	CIL1126S0097	new	3805	Sense LncRNAs
Gene013526	CIL1127S0025	Isoform030173	CIL1127S0025	new	286	Sense LncRNAs
Gene013553	-	Isoform030243	-	novel	2557	Intergenic LncRNAs
Gene013575	CIL1128S0063	Isoform030281	CIL1128S0063	new	221	Sense LncRNAs
Gene013577	-	Isoform030283	-	novel	686	Intergenic LncRNAs
Gene013584	-	Isoform030295	-	novel	790	Intergenic LncRNAs
Gene013611	CIL1130S0052	Isoform030358	CIL1130S0052	new	229	Sense LncRNAs
Gene013619	-	Isoform030372	-	novel	202	Other
Gene013622	-	Isoform030375	-	novel	841	Intergenic LncRNAs
Gene013623	-	Isoform030376	-	novel	2290	Intergenic LncRNAs
Gene013653	-	Isoform030461	-	novel	1552	Intergenic LncRNAs
Gene013671	-	Isoform030510	-	novel	254	Bidirectional LncRNAs
Gene013684	CIL1131S0088	Isoform030542	CIL1131S0088	new	225	Sense LncRNAs
Gene013698	-	Isoform030562	-	novel	648	Antisense LncRNAs
Gene013702	CIL1131S0069	Isoform030567	-	novel	413	Other
Gene013715	-	Isoform030589	-	novel	2250	Intergenic LncRNAs
Gene013725	-	Isoform030602	-	novel	265	Intergenic LncRNAs
Gene013770	CIL1133S0042	Isoform030705	CIL1133S0042	new	311	Sense LncRNAs
Gene013771	CIL1133S0043,CIL1133S0044	Isoform030711	CIL1133S0044	new	952	Sense LncRNAs
Gene013776	-	Isoform030724	-	novel	247	Intronic LncRNAs
Gene013780	CIL1134S0011	Isoform030735	CIL1134S0011	new	408	Intronic LncRNAs
Gene013781	CIL1134S0012	Isoform030738	CIL1134S0012	new	1742	Intronic LncRNAs
Gene013792	CIL1134S0042	Isoform030755	CIL1134S0042	new	782	Sense LncRNAs
Gene013809	-	Isoform030787	-	novel	517	Other
Gene013811	CIL1134S0005	Isoform030789	CIL1134S0005	new	1058	Sense LncRNAs
Gene013812	CIL1134S0009	Isoform030790	CIL1134S0009	new	213	Sense LncRNAs
Gene013837	CIL1135S0046	Isoform030854	CIL1135S0046	new	410	Sense LncRNAs
Gene013842	CIL1135S0004	Isoform030863	CIL1135S0004	new	189	Sense LncRNAs
Gene013842	CIL1135S0004	Isoform030867	CIL1135S0004	new	2480	Sense LncRNAs
Gene013853	CIL1135S0054	Isoform030889	CIL1135S0054	new	3109	Sense LncRNAs
Gene013886	-	Isoform030945	-	novel	897	Other
Gene013894	CIL1136S0054	Isoform030966	CIL1136S0054	new	697	Sense LncRNAs
Gene013894	CIL1136S0054	Isoform030967	CIL1136S0054	new	2265	Sense LncRNAs
Gene013915	-	Isoform031004	-	novel	3046	Intergenic LncRNAs
Gene013939	-	Isoform031050	-	novel	493	Intergenic LncRNAs
Gene013944	CIL1138S0018	Isoform031059	CIL1138S0018	new	306	Sense LncRNAs
Gene013955	CIL1138S0071	Isoform031073	CIL1138S0071	new	3175	Sense LncRNAs
Gene013955	CIL1138S0071	Isoform031074	CIL1138S0071	new	1729	Sense LncRNAs
Gene013963	-	Isoform031090	-	novel	312	Intergenic LncRNAs
Gene013964	-	Isoform031091	-	novel	838	Antisense LncRNAs
Gene013964	-	Isoform031092	-	novel	432	Antisense LncRNAs
Gene013968	CIL0101S0002	Isoform031100	CIL0101S0002	new	339	Sense LncRNAs
Gene013970	-	Isoform031104	-	novel	3664	Intergenic LncRNAs
Gene013983	CIL1139S0034	Isoform031130	-	novel	249	Other
Gene013989	CIL1141S0018	Isoform031150	CIL1141S0018	new	200	Sense LncRNAs
Gene014005	CIL1141S0020	Isoform031185	CIL1141S0020	new	254	Sense LncRNAs
Gene014049	CIL1143S0075,CIL1143S0076	Isoform031285	-	novel	251	Bidirectional LncRNAs
Gene014063	CIL1143S0012	Isoform031320	CIL1143S0012	new	194	Sense LncRNAs
Gene014069	-	Isoform031335	-	novel	693	Other
Gene014104	CIL1144S0052	Isoform031424	CIL1144S0052	new	3158	Intronic LncRNAs
Gene014112	CIL1144S0022	Isoform031438	CIL1144S0022	new	2294	Sense LncRNAs
Gene014114	CIL1144S0029	Isoform031441	CIL1144S0029	new	444	Intronic LncRNAs
Gene014126	CIL1145S0016,CIL1145S0017	Isoform031463	CIL1145S0016	new	181	Sense LncRNAs
Gene014126	CIL1145S0016,CIL1145S0017	Isoform031469	CIL1145S0016	new	349	Sense LncRNAs
Gene014127	CIL1145S0022	Isoform031473	CIL1145S0022	new	168	Sense LncRNAs
Gene014139	-	Isoform031497	-	novel	179	Intronic LncRNAs
Gene014140	-	Isoform031498	-	novel	3861	Antisense LncRNAs
Gene014152	CIL1145S0119	Isoform031534	CIL1145S0119	new	171	Sense LncRNAs
Gene014155	CIL1145S0125	Isoform031545	CIL1145S0125	new	320	Sense LncRNAs
Gene014168	CIL1145S0018	Isoform031578	CIL1145S0018	new	777	Sense LncRNAs
Gene014209	CIL1145S0158	Isoform031651	CIL1145S0158	new	362	Sense LncRNAs
Gene014220	CIL1146S0028,CIL1146S0034	Isoform031679	CIL1146S0028,CIL1146S0034	new	1347	Antisense LncRNAs,Sense LncRNAs
Gene014222	CIL1146S0046	Isoform031689	CIL1146S0046	new	279	Sense LncRNAs
Gene014224	-	Isoform031691	-	novel	375	Intergenic LncRNAs
Gene014226	-	Isoform031693	-	novel	613	Intergenic LncRNAs
Gene014228	CIL1146S0019	Isoform031695	CIL1146S0019	new	803	Sense LncRNAs
Gene014235	CIL1146S0053	Isoform031727	CIL1146S0053	new	177	Sense LncRNAs
Gene014253	-	Isoform031777	-	novel	550	Intergenic LncRNAs
Gene014253	-	Isoform031778	-	novel	2857	Intergenic LncRNAs
Gene014259	CIL1147S0078	Isoform031801	CIL1147S0078	new	1197	Sense LncRNAs
Gene014273	CIL1147S0027	Isoform031842	CIL1147S0027	new	2491	Sense LncRNAs
Gene014305	-	Isoform031919	-	novel	425	Intergenic LncRNAs
Gene014310	CIL1148S0060,CIL1148S0061,CIL1148S0064	Isoform031926	CIL1148S0060,CIL1148S0061,CIL1148S0064	new	4994	Antisense LncRNAs,Sense LncRNAs
Gene014310	CIL1148S0060,CIL1148S0061,CIL1148S0064	Isoform031927	CIL1148S0060,CIL1148S0061,CIL1148S0064	new	577	Antisense LncRNAs,Sense LncRNAs
Gene014326	CIL1148S0049	Isoform031960	CIL1148S0049	new	189	Sense LncRNAs
Gene014331	-	Isoform031966	-	novel	1547	Intergenic LncRNAs
Gene014331	-	Isoform031967	-	novel	3927	Intergenic LncRNAs
Gene014337	CIL1149S0016	Isoform031974	CIL1149S0016	new	4389	Intronic LncRNAs
Gene014348	CIL1149S0058	Isoform031995	CIL1149S0058	new	4301	Sense LncRNAs
Gene014363	CIL1149S0025,CIL1149S0026	Isoform032020	CIL1149S0025	new	654	Sense LncRNAs
Gene014366	-	Isoform032026	-	novel	2326	Bidirectional LncRNAs
Gene014366	-	Isoform032027	-	novel	609	Intergenic LncRNAs
Gene014381	CIL1151S0001	Isoform032064	CIL1151S0001	new	4317	Intronic LncRNAs
Gene014387	CIL1151S0014	Isoform032076	CIL1151S0014	new	208	Sense LncRNAs
Gene014391	-	Isoform032083	-	novel	273	Intergenic LncRNAs
Gene014405	CIL1152S0066	Isoform032118	CIL1152S0066	new	304	Sense LncRNAs
Gene014406	-	Isoform032120	-	novel	559	Intergenic LncRNAs
Gene014412	-	Isoform032130	-	novel	291	Intergenic LncRNAs
Gene014430	CIL1153S0029	Isoform032170	CIL1153S0029	new	2631	Sense LncRNAs
Gene014431	CIL1153S0032	Isoform032174	CIL1153S0032	new	265	Sense LncRNAs
Gene014433	CIL1153S0047	Isoform032187	-	novel	234	Other
Gene014434	-	Isoform032188	-	novel	368	Antisense LncRNAs
Gene014440	CIL1153S0074	Isoform032199	CIL1153S0074	new	1432	Sense LncRNAs
Gene014441	-	Isoform032202	-	novel	225	Intergenic LncRNAs
Gene014451	CIL1153S0119	Isoform032229	CIL1153S0119	new	2934	Sense LncRNAs
Gene014454	CIL1153S0134	Isoform032234	CIL1153S0134	new	2305	Sense LncRNAs
Gene014482	CIL1153S0125	Isoform032462	CIL1153S0125	new	2590	Sense LncRNAs
Gene014483	-	Isoform032463	-	novel	554	Intergenic LncRNAs
Gene014489	CIL1154S0001,CIL1154S0008,CIL1154S0009	Isoform032471	CIL1154S0001,CIL1154S0008,CIL1154S0009	new	3089	Sense LncRNAs
Gene014489	CIL1154S0001,CIL1154S0008,CIL1154S0009	Isoform032472	CIL1154S0008,CIL1154S0009	new	3813	Sense LncRNAs
Gene014489	CIL1154S0001,CIL1154S0008,CIL1154S0009	Isoform032473	CIL1154S0008,CIL1154S0009	new	3652	Sense LncRNAs
Gene014509	CIL1154S0040	Isoform032507	CIL1154S0040	new	755	Sense LncRNAs
Gene014515	-	Isoform032515	-	novel	673	Antisense LncRNAs
Gene014543	CIL1155S0014	Isoform032571	CIL1155S0014	new	932	Antisense LncRNAs,Sense LncRNAs
Gene014559	-	Isoform032604	-	novel	3528	Intergenic LncRNAs
Gene014559	-	Isoform032605	-	novel	3698	Intergenic LncRNAs
Gene014562	CIL1156S0030,CIL1156S0031,CIL1156S0032,CIL1156S0035	Isoform032614	CIL1156S0035	new	236	Sense LncRNAs
Gene014568	CIL1156S0058	Isoform032632	CIL1156S0058	new	208	Sense LncRNAs
Gene014571	-	Isoform032645	-	novel	481	Intronic LncRNAs
Gene014603	CIL1157S0040	Isoform032726	CIL1157S0040	new	394	Sense LncRNAs
Gene014618	CIL1157S0092	Isoform032760	CIL1157S0092	new	4144	Sense LncRNAs
Gene014618	CIL1157S0092	Isoform032762	CIL1157S0092	new	5243	Sense LncRNAs
Gene014622	-	Isoform032771	-	novel	391	Bidirectional LncRNAs
Gene014624	CIL1157S0001,CIL1157S0002	Isoform032784	CIL1157S0002	new	1486	Sense LncRNAs
Gene014632	CIL1157S0024	Isoform032813	CIL1157S0024	new	370	Intronic LncRNAs
Gene014633	CIL1157S0026	Isoform032816	CIL1157S0026	new	2323	Sense LncRNAs
Gene014637	CIL1157S0035	Isoform032821	CIL1157S0035	new	2759	Intronic LncRNAs
Gene014641	CIL1157S0042	Isoform032831	CIL1157S0042	new	1809	Sense LncRNAs
Gene014660	CIL1158S0026	Isoform032870	CIL1158S0026	new	361	Intronic LncRNAs
Gene014695	CIL1158S0075	Isoform032934	CIL1158S0075	new	487	Sense LncRNAs
Gene014697	CIL1158S0076	Isoform032937	CIL1158S0076	new	344	Sense LncRNAs
Gene014704	-	Isoform032948	-	novel	1386	Intergenic LncRNAs
Gene014707	CIL1161S0004	Isoform032952	CIL1161S0004	new	533	Sense LncRNAs
Gene014707	CIL1161S0004	Isoform032953	CIL1161S0004	new	796	Sense LncRNAs
Gene014714	CIL1161S0006	Isoform032965	CIL1161S0006	new	410	Sense LncRNAs
Gene014732	CIL1162S0026	Isoform032999	CIL1162S0026	new	2972	Sense LncRNAs
Gene014735	CIL1163S0007	Isoform033007	CIL1163S0007	new	2997	Intronic LncRNAs
Gene014735	CIL1163S0007	Isoform033008	CIL1163S0007	new	252	Sense LncRNAs
Gene014736	-	Isoform033009	-	novel	1872	Intronic LncRNAs
Gene014737	-	Isoform033010	-	novel	883	Intronic LncRNAs
Gene014751	-	Isoform033040	-	novel	530	Intergenic LncRNAs
Gene014772	CIL1164S0066	Isoform033100	CIL1164S0066	new	231	Sense LncRNAs
Gene014773	CIL1164S0067	Isoform033101	CIL1164S0067	new	567	Sense LncRNAs
Gene014776	-	Isoform033106	-	novel	572	Intergenic LncRNAs
Gene014787	-	Isoform033121	-	novel	397	Other
Gene014801	-	Isoform033154	-	novel	265	Intergenic LncRNAs
Gene014810	CIL1165S0006	Isoform033173	CIL1165S0006	new	206	Sense LncRNAs
Gene014813	CIL1165S0010	Isoform033181	CIL1165S0010	new	1091	Sense LncRNAs
Gene014814	-	Isoform033182	-	novel	192	Intronic LncRNAs
Gene014816	-	Isoform033186	-	novel	3462	Antisense LncRNAs
Gene014822	CIL1166S0003	Isoform033200	CIL1166S0003	new	285	Sense LncRNAs
Gene014826	CIL1166S0020	Isoform033210	CIL1166S0020	new	3178	Intronic LncRNAs
Gene014830	CIL1166S0036	Isoform033217	CIL1166S0036	new	1785	Sense LncRNAs
Gene014832	CIL1166S0042	Isoform033234	CIL1166S0042	new	633	Sense LncRNAs
Gene014844	CIL1166S0026	Isoform033271	CIL1166S0026	new	4473	Sense LncRNAs
Gene014850	-	Isoform033279	-	novel	924	Bidirectional LncRNAs
Gene014860	CIL1167S0046	Isoform033297	CIL1167S0046	new	248	Sense LncRNAs
Gene014886	CIL1167S0069	Isoform033373	CIL1167S0069	new	3137	Sense LncRNAs
Gene014889	-	Isoform033383	-	novel	4532	Antisense LncRNAs
Gene014890	-	Isoform033385	-	novel	546	Antisense LncRNAs
Gene014891	-	Isoform033387	-	novel	3738	Intergenic LncRNAs
Gene014904	CIL1169S0010	Isoform033421	CIL1169S0010	new	2917	Sense LncRNAs
Gene014908	-	Isoform033432	-	novel	2858	Antisense LncRNAs
Gene014919	CIL1171S0040|CIL1171S0039	Isoform033467	CIL1171S0040	new	220	Sense LncRNAs
Gene014921	-	Isoform033469	-	novel	1371	Intergenic LncRNAs
Gene014922	CIL1171S0063	Isoform033471	CIL1171S0063	new	1881	Sense LncRNAs
Gene014939	CIL1172S0007	Isoform033509	CIL1172S0007	new	732	Sense LncRNAs
Gene014946	-	Isoform033532	-	novel	3706	Antisense LncRNAs
Gene014946	-	Isoform033533	-	novel	2242	Antisense LncRNAs
Gene014952	-	Isoform033542	-	novel	1093	Antisense LncRNAs
Gene014955	CIL1172S0022,CIL1172S0023	Isoform033547	CIL1172S0022,CIL1172S0023	new	1713	Sense LncRNAs
Gene014967	CIL1173S0036	Isoform033571	CIL1173S0036	new	421	Sense LncRNAs
Gene014968	CIL1173S0042	Isoform033572	CIL1173S0042	new	302	Sense LncRNAs
Gene014984	CIL1173S0020	Isoform033624	CIL1173S0020	new	359	Sense LncRNAs
Gene014998	CIL1173S0082	Isoform033655	CIL1173S0082	new	324	Sense LncRNAs
Gene015003	CIL1175S0004	Isoform033669	CIL1175S0004	new	179	Sense LncRNAs
Gene015004	CIL1175S0006	Isoform033670	CIL1175S0006	new	2599	Sense LncRNAs
Gene015008	-	Isoform033689	-	novel	276	Intergenic LncRNAs
Gene015015	CIL1175S0052	Isoform033710	CIL1175S0052	new	459	Sense LncRNAs
Gene015038	CIL1175S0049,CIL1175S0051,CIL1175S0053,CIL1175S0054,CIL1175S0055,CIL1175S0056,CIL1175S0057	Isoform033749	-	novel	490	Antisense LncRNAs
Gene015052	-	Isoform033782	-	novel	3450	Intergenic LncRNAs
Gene015055	-	Isoform033788	-	novel	892	Intergenic LncRNAs
Gene015057	CIL1176S0040	Isoform033794	CIL1176S0040	new	154	Sense LncRNAs
Gene015065	-	Isoform033813	-	novel	556	Intergenic LncRNAs
Gene015066	-	Isoform033814	-	novel	1505	Intergenic LncRNAs
Gene015083	CIL1176S0052,CIL1176S0053	Isoform033841	CIL1176S0052	new	3152	Intronic LncRNAs
Gene015083	CIL1176S0052,CIL1176S0053	Isoform033842	CIL1176S0052	new	5476	Intronic LncRNAs
Gene015095	CIL1178S0023	Isoform033855	CIL1178S0023	new	630	Sense LncRNAs
Gene015110	CIL1178S0021	Isoform033885	CIL1178S0021	new	937	Sense LncRNAs
Gene015116	-	Isoform033892	-	novel	1114	Intergenic LncRNAs
Gene015130	-	Isoform033920	-	novel	946	Intronic LncRNAs
Gene015138	-	Isoform033934	-	novel	466	Intergenic LncRNAs
Gene015141	CIL1180S0023	Isoform033948	CIL1180S0023	new	264	Sense LncRNAs
Gene015146	-	Isoform033974	-	novel	1016	Intergenic LncRNAs
Gene015155	CIL1180S0027	Isoform033989	CIL1180S0027	new	477	Sense LncRNAs
Gene015159	CIL1180S0043	Isoform033996	CIL1180S0043	new	3210	Sense LncRNAs
Gene015176	-	Isoform034017	-	novel	3263	Antisense LncRNAs
Gene015184	CIL1181S0051	Isoform034033	CIL1181S0051	new	439	Sense LncRNAs
Gene015223	CIL1183S0002	Isoform034093	CIL1183S0002	new	262	Sense LncRNAs
Gene015232	-	Isoform034109	-	novel	618	Other
Gene015239	CIL1184S0068	Isoform034140	CIL1184S0068	new	570	Sense LncRNAs
Gene015257	CIL1184S0047	Isoform034192	CIL1184S0047	new	632	Sense LncRNAs
Gene015257	CIL1184S0047	Isoform034193	CIL1184S0047	new	686	Sense LncRNAs
Gene015264	-	Isoform034201	-	novel	246	Intronic LncRNAs
Gene015272	CIL0106S0010	Isoform034218	CIL0106S0010	new	365	Sense LncRNAs
Gene015273	CIL1185S0006	Isoform034222	CIL1185S0006	new	3195	Intronic LncRNAs
Gene015280	-	Isoform034230	-	novel	645	Other
Gene015291	CIL1187S0008,CIL1187S0009	Isoform034247	CIL1187S0008,CIL1187S0009	new	509	Sense LncRNAs
Gene015313	CIL1187S0081	Isoform034325	CIL1187S0081	new	2059	Sense LncRNAs
Gene015328	CIL1187S0053	Isoform034348	CIL1187S0053	new	258	Sense LncRNAs
Gene015330	CIL1187S0055,CIL1187S0056,CIL1187S0058,CIL1187S0064,CIL1187S0065,CIL1187S0066,CIL1187S0072,CIL1187S0073,CIL1187S0075	Isoform034354	-	novel	403	Antisense LncRNAs
Gene015330	CIL1187S0055,CIL1187S0056,CIL1187S0058,CIL1187S0064,CIL1187S0065,CIL1187S0066,CIL1187S0072,CIL1187S0073,CIL1187S0075	Isoform034359	CIL1187S0073	new	357	Sense LncRNAs
Gene015360	CIL1189S0021	Isoform034432	CIL1189S0021	new	1215	Sense LncRNAs
Gene015360	CIL1189S0021	Isoform034433	CIL1189S0021	new	900	Sense LncRNAs
Gene015376	-	Isoform034473	-	novel	1841	Intergenic LncRNAs
Gene015393	CIL1190S0053	Isoform034515	CIL1190S0053	new	1097	Sense LncRNAs
Gene015398	CIL1190S0063	Isoform034534	-	novel	1072	Other
Gene015407	CIL1192S0028	Isoform034552	CIL1192S0028	new	227	Sense LncRNAs
Gene015425	-	Isoform034580	-	novel	1081	Antisense LncRNAs
Gene015434	-	Isoform034594	-	novel	1061	Intergenic LncRNAs
Gene015440	CIL1193S0043	Isoform034604	CIL1193S0043	new	3984	Sense LncRNAs
Gene015440	CIL1193S0043	Isoform034605	CIL1193S0043	new	4765	Sense LncRNAs
Gene015440	CIL1193S0043	Isoform034606	CIL1193S0043	new	4777	Sense LncRNAs
Gene015440	CIL1193S0043	Isoform034607	CIL1193S0043	new	3221	Sense LncRNAs
Gene015440	CIL1193S0043	Isoform034608	CIL1193S0043	new	3646	Sense LncRNAs
Gene015455	CIL1193S0039	Isoform034653	CIL1193S0039	new	1877	Sense LncRNAs
Gene015464	-	Isoform034670	-	novel	3329	Other
Gene015470	CIL1194S0012	Isoform034686	CIL1194S0012	new	262	Sense LncRNAs
Gene015475	CIL1194S0035	Isoform034692	CIL1194S0035	new	2414	Sense LncRNAs
Gene015482	CIL1194S0016,CIL1194S0017	Isoform034701	-	novel	265	Other
Gene015489	CIL1194S0048	Isoform034710	CIL1194S0048	new	3841	Sense LncRNAs
Gene015493	-	Isoform034718	-	novel	561	Intergenic LncRNAs
Gene015494	CIL1196S0013	Isoform034720	CIL1196S0013	new	273	Intronic LncRNAs
Gene015503	CIL1196S0052	Isoform034748	CIL1196S0052	new	214	Sense LncRNAs
Gene015511	CIL1196S0071	Isoform034769	CIL1196S0071	new	3179	Sense LncRNAs
Gene015526	CIL1196S0035	Isoform034793	CIL1196S0035	new	515	Sense LncRNAs
Gene015544	CIL1196S0078	Isoform034821	CIL1196S0078	new	1822	Sense LncRNAs
Gene015572	CIL1197S0077	Isoform034891	CIL1197S0077	new	407	Sense LncRNAs
Gene015597	CIL1197S0072	Isoform034946	CIL1197S0072	new	4208	Sense LncRNAs
Gene015599	CIL1197S0078	Isoform034953	CIL1197S0078	new	4853	Sense LncRNAs
Gene015604	CIL1198S0001	Isoform034961	CIL1198S0001	new	1309	Sense LncRNAs
Gene015604	CIL1198S0001	Isoform034962	CIL1198S0001	new	688	Sense LncRNAs
Gene015605	CIL1198S0004,CIL1198S0009,CIL1198S0014,CIL1198S0016,CIL1198S0018,CIL1198S0019,CIL1198S0020,CIL1198S0021	Isoform034977	-	novel	671	Intergenic LncRNAs
Gene015622	CIL1198S0039	Isoform035022	CIL1198S0039	new	2993	Intronic LncRNAs
Gene015654	CIL1201S0066	Isoform035071	CIL1201S0066	new	3062	Sense LncRNAs
Gene015668	CIL1203S0003	Isoform035121	CIL1203S0003	new	1247	Sense LncRNAs
Gene015678	CIL1204S0008	Isoform035137	CIL1204S0008	new	2769	Sense LncRNAs
Gene015683	-	Isoform035147	-	novel	2958	Intergenic LncRNAs
Gene015683	-	Isoform035148	-	novel	418	Intergenic LncRNAs
Gene015695	CIL1204S0017,CIL1204S0018	Isoform035180	-	novel	184	Other
Gene015697	CIL1204S0022	Isoform035189	CIL1204S0022	new	427	Sense LncRNAs
Gene015699	CIL1204S0031	Isoform035195	CIL1204S0031	new	659	Sense LncRNAs
Gene015699	CIL1204S0031	Isoform035196	-	novel	268	Other
Gene015700	-	Isoform035197	-	novel	3451	Bidirectional LncRNAs
Gene015700	-	Isoform035198	-	novel	2745	Intergenic LncRNAs
Gene015711	-	Isoform035218	-	novel	664	Intergenic LncRNAs
Gene015721	CIL1205S0034	Isoform035257	CIL1205S0034	new	4317	Sense LncRNAs
Gene015738	-	Isoform035302	-	novel	783	Intergenic LncRNAs
Gene015739	-	Isoform035303	-	novel	5495	Antisense LncRNAs
Gene015742	-	Isoform035307	-	novel	391	Intergenic LncRNAs
Gene015746	CIL1207S0019	Isoform035312	CIL1207S0019	new	403	Sense LncRNAs
Gene015763	-	Isoform035340	-	novel	451	Intronic LncRNAs
Gene015765	CIL1207S0072	Isoform035345	CIL1207S0072	new	188	Sense LncRNAs
Gene015774	CIL1207S0046	Isoform035367	CIL1207S0046	new	381	Sense LncRNAs
Gene015782	-	Isoform035382	-	novel	4509	Intergenic LncRNAs
Gene015784	CIL1209S0016	Isoform035386	CIL1209S0016	new	504	Sense LncRNAs
Gene015790	CIL1209S0020	Isoform035397	CIL1209S0020	new	328	Sense LncRNAs
Gene015798	CIL1210S0056,CIL1210S0057,CIL1210S0058,CIL1210S0059,CIL1210S0061	Isoform035410	CIL1210S0056,CIL1210S0057,CIL1210S0058,CIL1210S0059,CIL1210S0061	new	1914	Antisense LncRNAs,Sense LncRNAs
Gene015804	-	Isoform035423	-	novel	211	Intergenic LncRNAs
Gene015816	CIL1211S0041	Isoform035444	CIL1211S0041	new	336	Sense LncRNAs
Gene015825	CIL1211S0028	Isoform035462	CIL1211S0028	new	339	Sense LncRNAs
Gene015834	CIL1212S0012	Isoform035480	CIL1212S0012	new	225	Sense LncRNAs
Gene015841	CIL1212S0037	Isoform035497	CIL1212S0037	new	3285	Sense LncRNAs
Gene015851	-	Isoform035521	-	novel	607	Intergenic LncRNAs
Gene015868	-	Isoform035568	-	novel	428	Antisense LncRNAs
Gene015879	CIL1216S0018	Isoform035597	CIL1216S0018	new	393	Sense LncRNAs
Gene015884	CIL1216S0031	Isoform035611	CIL1216S0031	new	164	Sense LncRNAs
Gene015901	CIL1216S0082	Isoform035656	CIL1216S0082	new	370	Sense LncRNAs
Gene015911	-	Isoform035679	-	novel	193	Intergenic LncRNAs
Gene015915	-	Isoform035685	-	novel	397	Intergenic LncRNAs
Gene015917	CIL1216S0065	Isoform035691	CIL1216S0065	new	306	Sense LncRNAs
Gene015920	CIL1216S0072	Isoform035697	CIL1216S0072	new	1852	Sense LncRNAs
Gene015938	-	Isoform035748	-	novel	3208	Intronic LncRNAs
Gene015946	CIL1218S0049	Isoform035766	CIL1218S0049	new	571	Sense LncRNAs
Gene015960	CIL1219S0032	Isoform035795	CIL1219S0032	new	276	Sense LncRNAs
Gene015962	CIL1219S0043	Isoform035798	CIL1219S0043	new	341	Sense LncRNAs
Gene015964	CIL1219S0062,CIL1219S0065	Isoform035805	CIL1219S0065	new	302	Sense LncRNAs
Gene015978	CIL1219S0019	Isoform035847	CIL1219S0019	new	181	Sense LncRNAs
Gene015999	CIL1219S0077	Isoform035888	CIL1219S0077	new	341	Sense LncRNAs
Gene016007	CIL1220S0028	Isoform035900	CIL1220S0028	new	631	Sense LncRNAs
Gene016038	-	Isoform035975	-	novel	188	Intergenic LncRNAs
Gene016053	-	Isoform036004	-	novel	437	Intergenic LncRNAs
Gene016057	CIL1222S0046	Isoform036021	CIL1222S0046	new	309	Sense LncRNAs
Gene016062	CIL1222S0068	Isoform036036	CIL1222S0068	new	1934	Sense LncRNAs
Gene016063	CIL1224S0005	Isoform036039	CIL1224S0005	new	350	Sense LncRNAs
Gene016070	-	Isoform036050	-	novel	2707	Bidirectional LncRNAs
Gene016070	-	Isoform036051	-	novel	254	Intergenic LncRNAs
Gene016088	-	Isoform036087	-	novel	406	Intronic LncRNAs
Gene016089	CIL1225S0002	Isoform036088	CIL1225S0002	new	1404	Sense LncRNAs
Gene016093	CIL1225S0034	Isoform036092	CIL1225S0034	new	178	Intronic LncRNAs
Gene016101	CIL1226S0022	Isoform036105	CIL1226S0022	new	406	Intronic LncRNAs
Gene016119	CIL1226S0036	Isoform036139	CIL1226S0036	new	4001	Sense LncRNAs
Gene016119	CIL1226S0036	Isoform036140	CIL1226S0036	new	2919	Sense LncRNAs
Gene016126	CIL1226S0056	Isoform036157	CIL1226S0056	new	236	Sense LncRNAs
Gene016129	CIL1226S0065	Isoform036164	-	novel	168	Other
Gene016132	CIL1227S0018	Isoform036175	CIL1227S0018	new	2554	Intronic LncRNAs
Gene016142	-	Isoform036188	-	novel	187	Intronic LncRNAs
Gene016170	CIL1229S0051	Isoform036267	CIL1229S0051	new	1340	Sense LncRNAs
Gene016179	CIL1229S0064	Isoform036292	-	novel	369	Other
Gene016197	CIL1230S0018	Isoform036324	CIL1230S0018	new	731	Sense LncRNAs
Gene016197	CIL1230S0018	Isoform036330	CIL1230S0018	new	1048	Sense LncRNAs
Gene016204	-	Isoform036338	-	novel	1450	Bidirectional LncRNAs
Gene016221	-	Isoform036376	-	novel	916	Antisense LncRNAs
Gene016231	CIL1230S0089	Isoform036421	CIL1230S0089	new	556	Sense LncRNAs
Gene016256	CIL1231S0050	Isoform036486	CIL1231S0050	new	292	Sense LncRNAs
Gene016266	CIL1232S0053	Isoform036510	CIL1232S0053	new	417	Sense LncRNAs
Gene016269	CIL1232S0046	Isoform036514	CIL1232S0046	new	487	Sense LncRNAs
Gene016270	CIL1232S0049	Isoform036515	CIL1232S0049	new	1389	Sense LncRNAs
Gene016272	CIL1235S0008	Isoform036527	CIL1235S0008	new	870	Sense LncRNAs
Gene016273	CIL1235S0009	Isoform036529	CIL1235S0009	new	795	Sense LncRNAs
Gene016274	CIL1235S0010	Isoform036532	CIL1235S0010	new	2340	Sense LncRNAs
Gene016274	CIL1235S0010	Isoform036534	CIL1235S0010	new	247	Sense LncRNAs
Gene016296	CIL1235S0036	Isoform036590	CIL1235S0036	new	505	Sense LncRNAs
Gene016298	-	Isoform036592	-	novel	1661	Bidirectional LncRNAs
Gene016307	CIL1236S0022	Isoform036609	CIL1236S0022	new	190	Sense LncRNAs
Gene016311	CIL1236S0050	Isoform036627	CIL1236S0050	new	643	Sense LncRNAs
Gene016314	-	Isoform036632	-	novel	444	Intergenic LncRNAs
Gene016315	CIL1236S0014,CIL1236S0015	Isoform036633	CIL1236S0014,CIL1236S0015	new	1992	Sense LncRNAs
Gene016315	CIL1236S0014,CIL1236S0015	Isoform036634	CIL1236S0014,CIL1236S0015	new	4041	Sense LncRNAs
Gene016319	CIL1236S0040	Isoform036645	CIL1236S0040	new	949	Sense LncRNAs
Gene016325	CIL1237S0014	Isoform036654	CIL1237S0014	new	586	Sense LncRNAs
Gene016333	CIL1237S0010,CIL1237S0011	Isoform036669	CIL1237S0010,CIL1237S0011	new	321	Sense LncRNAs
Gene016338	-	Isoform036684	-	novel	229	Intronic LncRNAs
Gene016367	CIL1240S0005	Isoform036755	CIL1240S0005	new	2724	Sense LncRNAs
Gene016367	CIL1240S0005	Isoform036756	CIL1240S0005	new	457	Sense LncRNAs
Gene016370	-	Isoform036764	-	novel	1312	Intergenic LncRNAs
Gene016381	CIL1240S0055,CIL1240S0056	Isoform036787	-	novel	239	Bidirectional LncRNAs
Gene016384	CIL1240S0067	Isoform036790	CIL1240S0067	new	1180	Sense LncRNAs
Gene016385	CIL1240S0007	Isoform036792	CIL1240S0007	new	925	Sense LncRNAs
Gene016387	CIL1240S0014	Isoform036794	CIL1240S0014	new	275	Sense LncRNAs
Gene016397	CIL1240S0059	Isoform036819	CIL1240S0059	new	309	Sense LncRNAs
Gene016402	CIL1242S0008,CIL1242S0009	Isoform036830	CIL1242S0008	new	163	Intronic LncRNAs
Gene016403	CIL1242S0011|CIL1242S0012	Isoform036835	CIL1242S0012	new	1964	Sense LncRNAs
Gene016413	CIL1242S0039	Isoform036854	CIL1242S0039	new	355	Sense LncRNAs
Gene016431	CIL1242S0014	Isoform036878	CIL1242S0014	new	1619	Sense LncRNAs
Gene016446	CIL1242S0095	Isoform036904	CIL1242S0095	new	2249	Sense LncRNAs
Gene016446	CIL1242S0095	Isoform036905	CIL1242S0095	new	2285	Sense LncRNAs
Gene016447	-	Isoform036906	-	novel	617	Intergenic LncRNAs
Gene016449	-	Isoform036908	-	novel	636	Intronic LncRNAs
Gene016454	-	Isoform036915	-	novel	352	Intergenic LncRNAs
Gene016460	-	Isoform036926	-	novel	607	Intergenic LncRNAs
Gene016463	CIL1244S0019	Isoform036932	CIL1244S0019	new	173	Intronic LncRNAs
Gene016465	-	Isoform036934	-	novel	494	Bidirectional LncRNAs
Gene016467	CIL1245S0034	Isoform036939	CIL1245S0034	new	474	Sense LncRNAs
Gene016475	CIL1245S0064	Isoform036953	CIL1245S0064	new	307	Sense LncRNAs
Gene016487	-	Isoform036988	-	novel	1348	Bidirectional LncRNAs
Gene016492	CIL1246S0009	Isoform037017	CIL1246S0009	new	305	Sense LncRNAs
Gene016496	CIL1246S0027,CIL1246S0028	Isoform037028	-	novel	1059	Other
Gene016503	CIL1246S0047,CIL1246S0049,CIL1246S0050,CIL1246S0051,CIL1246S0052,CIL1246S0053,CIL1246S0054,CIL1246S0055,CIL1246S0059,CIL1246S0060	Isoform037051	-	novel	300	Other
Gene016520	CIL1246S0124	Isoform037094	CIL1246S0124	new	441	Sense LncRNAs
Gene016523	CIL1246S0128	Isoform037099	CIL1246S0128	new	561	Sense LncRNAs
Gene016535	CIL1246S0039	Isoform037149	CIL1246S0039	new	2085	Sense LncRNAs
Gene016535	CIL1246S0039	Isoform037150	CIL1246S0039	new	1978	Sense LncRNAs
Gene016566	CIL1246S0139	Isoform037229	CIL1246S0139	new	1932	Sense LncRNAs
Gene016569	CIL1248S0025	Isoform037235	CIL1248S0025	new	4480	Sense LncRNAs
Gene016569	CIL1248S0025	Isoform037236	CIL1248S0025	new	2200	Intronic LncRNAs
Gene016571	-	Isoform037239	-	novel	2420	Intergenic LncRNAs
Gene016590	CIL1249S0004	Isoform037266	CIL1249S0004	new	605	Sense LncRNAs
Gene016591	CIL1249S0010	Isoform037268	CIL1249S0010	new	640	Sense LncRNAs
Gene016593	CIL1249S0027	Isoform037275	CIL1249S0027	new	615	Sense LncRNAs
Gene016594	-	Isoform037276	-	novel	212	Intergenic LncRNAs
Gene016605	CIL1251S0004	Isoform037294	-	novel	664	Other
Gene016608	-	Isoform037299	-	novel	449	Intergenic LncRNAs
Gene016624	CIL1253S0030	Isoform037321	CIL1253S0030	new	2044	Sense LncRNAs
Gene016629	-	Isoform037330	-	novel	245	Intergenic LncRNAs
Gene016637	-	Isoform037343	-	novel	1205	Antisense LncRNAs
Gene016637	-	Isoform037344	-	novel	940	Antisense LncRNAs
Gene016644	CIL1254S0006	Isoform037364	CIL1254S0006	new	536	Sense LncRNAs
Gene016646	-	Isoform037367	-	novel	1607	Intergenic LncRNAs
Gene016654	-	Isoform037396	-	novel	2291	Intergenic LncRNAs
Gene016654	-	Isoform037397	-	novel	2469	Intergenic LncRNAs
Gene016655	-	Isoform037398	-	novel	731	Intergenic LncRNAs
Gene016688	-	Isoform037466	-	novel	310	Intronic LncRNAs
Gene016697	CIL1256S0052	Isoform037490	CIL1256S0052	new	2073	Sense LncRNAs
